# 1 **Homology-directed repair using next-generation CRISPR/Cpf1-geminiviral** 2 **replicons in tomato**

3 Tien Van Vu<sup>1,2</sup>, Velu Sivankalyani<sup>1</sup>, Eun-Jung Kim<sup>1</sup>, Mil Thi Tran<sup>1</sup>, Jihae Kim<sup>1</sup>, Yeon Woo  
4 Sung<sup>1</sup>, Duong Thi Hai Doan<sup>1</sup>, Minwoo Park<sup>3</sup>, Jae-Yean Kim<sup>1,4,\*</sup>

5 <sup>1</sup>Division of Applied Life Science (BK21 Plus program), Plant Molecular Biology and  
6 Biotechnology Research Center, Gyeongsang National University, Jinju 660-701, Republic of  
7 Korea.

8 <sup>2</sup>National Key Laboratory for Plant Cell Biotechnology, Agricultural Genetics Institute, Km 02,  
9 Pham Van Dong road, Co Nhue 1, Bac Tu Liem, Hanoi 11917, Vietnam.

10 <sup>3</sup>Hyundai Seed Co., LTD., 286, Yeonsam-ro, Ganam, Yeosu, Gyeonggi-do, 12660, Korea.

11 <sup>4</sup>Division of Life Science, Gyeongsang National University, 501 Jinju-daero, Jinju 52828,  
12 Republic of Korea.

13 \* Correspondence: Jae-Yean Kim ([kimjy@gnu.ac.kr](mailto:kimjy@gnu.ac.kr))

## 14 **ABSTRACT**

15 **Genome editing via the homology-directed repair (HDR) pathway in somatic plant cells**  
16 **is very inefficient compared to error-prone repair by nonhomologous end joining**  
17 **(NHEJ). Here, we increased HDR-based genome editing efficiency approximately 3-fold**  
18 **compared to a Cas9-based single-replicon system via the use of *de novo* multiple replicon**  
19 **systems equipped with CRISPR/LbCpf1 in tomato and obtained replicon-free but stable**  
20 **HDR alleles. The efficiency of CRISPR/LbCpf1-based HDR was significantly modulated**  
21 **by physical culture conditions such as temperature and light. Ten days of incubation at**  
22 **31°C under a light/dark cycle after *Agrobacterium*-mediated transformation resulted in**

23 **the best performance among the tested conditions. Furthermore, we developed our**  
24 **single-replicon system into a next-generation multiple replicon system that effectively**  
25 **increased HDR efficiency. Although this approach is still challenging, we showed the**  
26 **feasibility of HDR-based genome editing of a salt-tolerant SIHKT1;2 allele without**  
27 **genomic integration of antibiotic markers or any phenotypic selection. Self-pollinated**  
28 **offspring plants carrying the HKT1;2 HDR allele showed stable inheritance and**  
29 **germination tolerance in the presence of 100 mM NaCl. Our work may pave the way for**  
30 **transgene-free editing of alleles of interest in asexually as well as sexually reproducing**  
31 **plants.**

32 **Key words:** homology-directed repair (HDR), gene targeting, CRISPR/Cpf1, allele  
33 replacement, Multiple replicon.

34 **Running title:** Advancement of plant HDR by multiple replicons.

## 35 **INTRODUCTION**

36 In plant somatic cells, double-strand DNA breaks (DSBs) are efficiently repaired by a  
37 nonhomologous end joining (NHEJ) mechanism, which dominates over the homology-directed  
38 repair (HDR) pathway (Jiang et al., 2013; Puchta, 2005). NHEJ repair usually leads to various  
39 types of mutations including DNA sequence insertions, deletions (Hsu et al., 2014; Zetsche et al.,  
40 2015), chromosome rearrangement, or chromosome relocation (Ferguson and Alt, 2001;  
41 Richardson et al., 1998; Varga and Aplan, 2005). Early in the 1990s, a transgenic approach using  
42 yeast mitochondrial I-Sce I endonuclease as a DSB inducer was adopted in attempts to  
43 investigate the mechanisms of DSB repair in plants, especially gene targeting via the HDR  
44 pathway in plant somatic cells (Fauser et al., 2012; Puchta et al., 1993), which have been the

45 main targets of recent plant genome engineering approaches (Baltes et al., 2014; Belhaj et al.,  
46 2013; Cermak et al., 2015; Nekrasov et al., 2013). In plant somatic cells, the HDR pathway  
47 employs homologous DNA templates to precisely repair damaged DNA, mainly via the  
48 synthesis-dependent strand annealing (SDSA) mechanism, with an extremely low  
49 efficiency(Puchta et al., 1996; Szostak et al., 1983), leading to difficulties in practical  
50 applications. Therefore, research on plant gene targeting has continued to focus on improving  
51 HDR efficacy. Previously reported data have indicated two most important factors affecting  
52 HDR efficiency in plant somatic cells: DSB formation and the amount of homologous DNA  
53 templates available at sites of breakage (Baltes et al., 2014; Endo et al., 2016; Puchta, 2005;  
54 Puchta et al., 1993; Townsend et al., 2009).

55 The recent development of the clustered regularly interspaced short palindromic repeats  
56 (CRISPR)/CRISPR-associated protein (Cas) system has provided excellent molecular scissors  
57 the generation of DSBs. *Streptococcus pyogenes* Cas 9 (SpCas9) (Sapranauskas et al., 2011) and  
58 *Lachnospiraceae bacterium* Cas12a (LbCas12a or LbCpf1) (Zetsche et al., 2015) have been  
59 adapted for wide use in genome engineering studies in various kingdoms including Plantae  
60 (Barrangou and Doudna, 2016; Hsu et al., 2014; Jinek et al., 2012). The former system generally  
61 generates blunt ends (Jinek et al., 2012) at DSBs, while the latter cuts in a cohesive end  
62 configuration (Zetsche et al., 2015). As a consequence of DSB repair by NHEJ, the two types of  
63 CRISPR complexes exhibit comparably high indel mutation rates under *in vivo* conditions, thus  
64 proving to be ideal tools for DSB formation for initiating targeted HDR in plants. Furthermore, it  
65 has been suggested that the Cpf1 complex might present an advantage in HDR-based genome  
66 editing compared to the Cas9 complex because the cutting site of Cpf1 is located distal to the  
67 core target sequence and the protospacer-adjacent motif (PAM), allowing recutting even after

68 indel mutations are introduced during NHEJ-mediated repair (Baltes et al., 2014; Zetsche et al.,  
69 2015). CRISPR/Cpf1 complexes were recently successfully applied for gene targeting in  
70 plants(Li et al., 2018), providing alternative options for T-rich target site selection.

71 Because of the highly efficient replication of geminivirus genomes and their single-stranded  
72 DNA nature, these genomes have been used as perfect DNA template cargo for gene targeting in  
73 plants. Geminiviral genomic DNAs have been reconstructed to exogenously overexpress foreign  
74 proteins in plants at up to 80-fold higher levels compared to those of conventional T-DNA (Mor  
75 et al., 2003; Needham et al., 1998; Zhang and Mason, 2006) systems, due to their highly  
76 autonomous replication inside host nuclei and the ability to reprogram cells (Gutierrez, 1999;  
77 Hanley-Bowdoin et al., 2013). Furthermore, Rep/RepA has been reported to promote a cell  
78 environment that is permissive for homologous recombination to stimulate the replication of  
79 viral DNA. Interestingly, it has been reported that somatic homologous recombination is  
80 promoted by geminiviral infection (Richter et al., 2014). The above characteristics of geminiviral  
81 replicons have been shown to make them perfect delivery tools for introducing large amounts of  
82 homologous donor templates to plant nuclei. Likewise, the movement and coat proteins of a bean  
83 yellow dwarf virus (BeYDV)-based replicon were removed and replaced with Cas9 or TALEN  
84 to improve gene targeting in plants (Baltes et al., 2014; Butler et al., 2016; Cermak et al., 2015;  
85 Dahan-Meir et al., 2018; Gil-Humanes et al., 2017; Hummel et al., 2018). The LbCpf1 complex,  
86 which was subsequently discovered and adapted for plant genome editing in 2015, has not been  
87 tested in combination with geminiviral replicon systems for plant gene targeting.

88 Despite higher success rates in gene targeting in plants using the geminiviral replicon system,  
89 most of the reported cases have required markers associated with the edited alleles, while the  
90 selection and regeneration of HDR events from edited cells are still challenging (Butler et al.,

91 2016; Gil-Humanes et al., 2017; Hummel et al., 2018). In addition, the effective application of  
92 replicon cargos in plant gene targeting has been shown to be limited by their size (Baltes et al.,  
93 2014; Suarez-Lopez and Gutierrez, 1997). Therefore, plant gene targeting, especially in cases  
94 of marker-free alleles, still requires improvement. We hypothesized that the combination of  
95 the repeatedly cutting nature of a CRISPR/Cpf1 complex and the highly autonomous  
96 replication of *de novo*-engineered geminiviral replicon systems could overcome the efficacy  
97 barrier of marker-free gene targeting via the HDR pathway in plants. Here, we report  
98 significant improvement of homology-directed repair using next-generation CRISPR/LbCpf1-  
99 geminiviral replicons in tomato and the successful application of the system to target a marker-  
100 free salt-tolerant HKT1;2 allele. Through this work, we aimed to increase HDR efficiency for  
101 practical application in a fast crop breeding scenario (Hickey et al., 2019).

## 102 **RESULTS AND DISCUSSION**

### 103 **The CRISPR/LbCpf1-based geminiviral replicon system is feasible for performing HDR in** 104 **tomato**

105 To test the hypothesis above, we re-engineered a bean yellow dwarf virus (BeYDV) replicon  
106 to supply a high dose of homologous donor templates and used the CRISPR/LbCpf1 system  
107 (Zetsche et al., 2015) for DSB formation (**Figure 1A** and **1B**). Two long intergenic regions  
108 (LIR) of BeYDV (pLSLR) (Baltes et al., 2014) were cloned in the same orientation with a  
109 short intergenic region (SIR) inserted between them, generating an LIR-SIR-LIR amplicon  
110 unit. To support the autonomous replication of the amplicon, the Rep/RepA coding sequence  
111 was also introduced *in cis* (in the center of the 3' side, SIR-LIR) and transcriptionally driven  
112 by the bidirectional promoter activity of the LIR. This cloning strategy interrupted a possible

113 upstream ORF of Rep/RepA and added an AAA Kozak consensus sequence (Kozak, 1981)  
114 upstream of the major ATG of Rep ([Supplemental Figure 1A](#) and [1B](#)), thus potentially  
115 contributing to increasing the translation of the Rep protein (Barbosa et al., 2013; Zhang et al.,  
116 2018). The selection of HDR events was performed with a double selection/screening system  
117 based on kanamycin resistance and anthocyanin overproduction ([Figure 1A](#)).

118 To validate our system, the LbCpf1 expression cassette driven by the CaMV 35S promoter  
119 and 5'UTR with AtUBI10 intron I (to suppress silencing effects (Christie et al., 2011)), guide  
120 RNA scaffolds driven by the AtU6 promoter (Belhaj et al., 2013) and donor templates were  
121 cloned into the *de novo*-engineered geminiviral DNA amplicon ([Figure 1B](#)) and transformed  
122 via *Agrobacterium*-mediated transformation into tomato cotyledon explants. The *de novo*-  
123 engineered geminiviral DNA amplicon system exhibited efficient and durable maintenance of  
124 circularized DNAs in mature tomato leaves ([Supplemental Figure 2](#)). The LbCpf1 system  
125 using two guide RNAs for targeting the ANT1 gene, a key transcription factor controlling the  
126 anthocyanin pathway, showed a much higher HDR efficiency, of  $4.51 \pm 0.63\%$  (normalized to  
127 an overexpression construct (pANT1<sup>ox</sup>, [Figure 1B](#))), than the other control constructs,  
128 including the “minus Rep” (pRep<sup>-</sup>) and “minus gRNA” (pgRNA<sup>-</sup>) constructs. LbCpf1 system-  
129 based HDR was visualized by the presence of purple calli and/or shoots ([Figure 1C](#) and [1D](#)),  
130 and its efficiency was similar to that of a CRISPR/SpCas9-based construct (pTC217) (Cermak  
131 et al., 2015) included in the same experiment ([Figure 1C](#)) or used in hexaploid wheat with the  
132 same scoring method (Gil-Humanes et al., 2017). It is worth noting that the normalized HDR  
133 efficiencies reported from this study ([see Materials and Methods section](#)) using transformed  
134 cell-based efficiency are calculated differently from those reported in the initial work by  
135 Čermák and coworkers (2015); the previous authors used the transformed cotyledon-based

136 efficiency, which is approximately one order of magnitude higher than the cell-based  
137 efficiency. The data obtained from this experiment revealed that functional geminiviral  
138 replicons were crucial for increasing HDR efficiencies of the Cpf1 complex. This result shows  
139 the feasibility of highly efficient HDR in plants using Cpf1 expressed from a geminiviral  
140 replicon, thus expanding the choices of molecular scissors for gene targeting in plants.

141 **Favorable physical conditions significantly increase the HDR efficiency of the**  
142 **CRISPR/LbCpf1-based geminiviral replicon system**

143 In seeking suitable physical conditions for *Agrobacterium*-mediated delivery and DSB repair  
144 using our HDR tool in tomato somatic cells, we investigated various incubation regimes at  
145 early stages posttransformation. Short-day conditions have been shown to have strong impacts  
146 on intrachromosomal recombination repair (ICR) in *Arabidopsis* (Boyko et al., 2005). We  
147 tested whether the same could be true for the gene targeting approach in tomato. Using  
148 various lighting regimes, including complete darkness (DD), short (8 hours light/16 hours  
149 dark; 8 L/16 D)- and long (16 L/8 D)-day conditions, we found that the HDR efficiencies  
150 achieved under short- and long-day conditions were higher than those under DD conditions in  
151 the case of LbCpf1 but not SpCas9 and reached  $6.62 \pm 1.29\%$  ( $p < 0.05$ , Figure 1E). Considering  
152 the similar repair activities observed after DSBs were generated by either of the CRISPR/Cas  
153 systems, it was quite difficult to explain why the light conditions only affected LbCpf1-based  
154 HDR in this experiment compared to the dark treatment. There must be unknown  
155 mechanism(s) that facilitate LbCpf1-mediated HDR in a light-dependent manner.

156 Temperature is an important factor controlling ICR (Boyko et al., 2005), CRISPR/Cas9-based  
157 targeted mutagenesis in plants (LeBlanc et al., 2018), and CRISPR/Cpf1-based HDR in

158 zebrafish and *Xenopus* by controlling genome accessibility (Moreno-Mateos et al., 2017).  
159 Pursuing the approach for the improvement of HDR, we compared the HDR efficiencies of  
160 the pHR01 and pTC217 systems subjected to various temperature treatments under an 8 L/16  
161 D photoperiod, since the two nucleases (SpCas9 and LbCpf1) may respond differently. Our  
162 data revealed that within a temperature range of 19-31°C, the somatic HDR efficiency  
163 increased with increasing temperature (Figure 1F). Notably, at 31°C, LbCpf1 showed an HDR  
164 efficiency (9.80±1.12%) that was more than 2-fold higher than that of SpCas9 (p<0.05) and  
165 was nearly twice that of a similar system in hexaploid wheat (Gil-Humanes et al., 2017) as  
166 well as an LbCpf1-based T-DNA tool in rice (Li et al., 2018). The results supported the  
167 principle of stress-stimulated HDR in plants reported by Boyko and coworkers (2005). The  
168 ease of LbCpf1 at genome accessibility at high temperatures (Moreno-Mateos et al., 2017) in  
169 combination with the ability to repeatedly cut at the target sites (Zetsche et al., 2015) may  
170 explain the higher HDR efficiency of LbCpf1 compared to that of SpCas9. In addition,  
171 Malzahn and coworkers (2019) recently reported dependency of Cpf1 cleavage activity on  
172 temperature. Interestingly, the LbCpf1 complex was shown to be highly active only at high  
173 temperatures (i.e., more than 29°C), which partially explains the higher HDR efficiencies  
174 observed at high temperatures in this experiment. Briefly, a comparison of data on plant HDR  
175 between Cas9- and Cpf1-based systems at different temperatures and under short-day  
176 conditions is presented to reveal the best conditions for plant HDR improvement.

177 **A multiple-replicon system outperformed the single-replicon system in HDR-based GE.**

178 The size of viral replicons has been shown to be inversely correlated with their copy numbers  
179 (Baltes et al., 2014; Suarez-Lopez and Gutierrez, 1997). In an approach to overcome the



180 replicon size limitation, we designed and tested the novel idea of using a T-DNA system that  
181 potentially produces multiple replicons ([Figure 2A](#), and [Supplemental Figure 3](#)). Compared to  
182 pHR01, a multiple-replicon system designed to release donor templates from replicon 2  
183 (MR02) but not replicon 1 (MR01) showed a significant increase in the HDR efficiency by 30%  
184 and reached up to  $12.79 \pm 0.37\%$  ([Figure 2B](#) and [Supplemental Table 1](#)). Temporal evaluation  
185 of donor template levels between the HDR tools showed significantly higher levels of MR02  
186 at 3 days posttransformation (dpt) compared to those of pHR01 and MR01 ([Figure 2C](#)).  
187 Higher donor template levels were available while CRISPR/Cas was generating DSBs at early  
188 times after transformation (3 dpt, MR02, [Figure 2C](#)) but not later (6 dpt, MR01, [Figure 2C](#)).  
189 Under the same conditions and calculation methods, the combination of our multiple replicons  
190 with LbCpf1 significantly increased HDR efficiencies by 3-4-fold compared to those of the  
191 Cas9-based replicon systems. We also confirmed the release of three circularized replicons  
192 from the single vector used in this work ([Figure 2D](#)) by PCR amplification using circularized  
193 replicon-specific primers ([Supplemental Table 2](#)).

194 In another test of the multiple replicon system, we overexpressed two key proteins involved in  
195 the plant HDR pathway from the replicon 1 site. Either SIRAD51 (Soly07g017540.2) or  
196 SIRAD54 (Soly04g056400.2) was overexpressed with the multiple replicon tools (MR03 and  
197 MR04) ([Figure 2A](#)). Surprisingly, even when the donor template level of MR03 or MR04 was  
198 nearly twice that of MR01 ([Figure 2C](#)), the HDR efficiency was not significantly different in  
199 the case of MR03 and was even significantly lower for MR04 ([Figure 2B](#) and [Supplemental](#)  
200 [Table 1](#)). Overexpression of SIRAD54 might increase the displacement of SIRAD51 from  
201 SIRAD51-bound dsDNAs at the early stage of HDR initiation (Petukhova et al., 1999), thereby  
202 suppressing HDR to some extent in the case of MR04 ([Figure 2B](#)). Overexpression of either

203 SIRAD51 or SIRAD54 increased geminiviral replication (replicon 2 and 3) several-fold  
204 compared to the control (MR02), confirming the positive roles of these proteins in  
205 geminivirus replication in a homologous recombination manner, as reported elsewhere  
206 (Kaliappan et al., 2012; Richter et al., 2016; Suyal et al., 2013) The data also revealed a  
207 temporal difference in the maximal peaks of replicon 1 and 2 because replicon 1 was not  
208 accompanied by a Rep/RepA expression cassette.

209 The multiple replicon system may provide more flexible choices for expressing multiple  
210 donor templates/genes/genetic tools in plant cells with temporally controllable copy levels  
211 without incurring an expression penalty from excess replicon sizes up to 18 kb (size of  
212 replicon 3 released by MR03). The validation of the multireplicon system provides an  
213 excellent alternative for genetic engineering in plants in addition to applications in plant  
214 genome editing. If we carefully design and clone multiple donor templates or gene expression  
215 cassettes into the multireplicons, we can control donor templates/gene doses without incurring  
216 penalties from excessing replicon size limitations.

### 217 **True ANT1 HDR events occurred at high frequency**

218 To verify HDR repair events, PCR analyses were conducted using primers specific for the left  
219 (UPANT1-F1/NptII-R1) and right (ZY010F/TC140R) (Figure 1A; Supplemental Table 3 and  
220 4) junctions employing genomic DNAs extracted from derived HDR events (independently  
221 regenerated purple plants or genome-edited generation 0 (GE0)) (Figure 3A, Supplemental  
222 Figure 4). For pHR01, all (16/16) of the independent events showed the expected band for  
223 right junction integration, and 10/16 independent events showed the expected band for left  
224 junction repair (Figure 3B). The PCR products were sequenced to identify junction sequences.

225 A majority of the events (11/16) showed sequences corresponding to perfect right arm  
226 integration through HDR repair, and 5/16 events showed a combination of HDR and NHEJ  
227 repair with an NHEJ fingerprint at the 5' terminus of the pNOS sequence ([Supplemental](#)  
228 [Figure 5A](#), with event C1.8 highlighted in blue) or even RB integration at the left junction  
229 boundary ([Supplemental Figure 6](#)). All of the sequences amplified from the left junctions  
230 showed perfected DNA sequence exchange via the HDR pathway ([Supplemental Figure 5B](#)).  
231 The results obtained in these analyses revealed the common features of products repaired via  
232 HDR pathways in plant somatic cells reported elsewhere in dicots (Butler et al., 2016; Cermak  
233 et al., 2015; Dahan-Meir et al., 2018) and monocots (Gil-Humanes et al., 2017; Li et al., 2018),  
234 regardless of whether a T-DNA or geminiviral replicon system was involved. More  
235 importantly, 15 out of 16 events showed no amplification of circularized forms of the DNA  
236 replicon, and even the replicon-carrying events lost this replicon after long-term growth in  
237 greenhouse conditions (data not shown), indicating that these plants were free of the replicon  
238 ([Figure 3B](#)). The absence of the replicon might be hypothetically explained by reverse  
239 construction of the donor template ([Figure 1B](#)), leading to the opposite arrangement of the  
240 LIR forward promoter sequence against a 35S promoter sequence (LIR-p35S orientation  
241 interference), which triggers a silencing mechanism in plant cells in later stages. This  
242 possibility was later supported by the appearance of replicons in the majority of plants  
243 regenerated using other replicon systems without LIR-p35S orientation interference.

#### 244 **The HDR allele was stably inherited in offspring by self-pollination as well as backcrossing**

245 To confirm stable heritable edits, we grew genome-edited generation 1 (GE1) plants ([Figure](#)  
246 [3C](#)) obtained from the self-pollination of LbCpf1-based HDR GE0 events and identified a

247 segregating population with a purple phenotype ([Supplemental Table 5](#)) similar to the  
248 segregating profiles shown by Čermák and coworkers (2015). PCR analyses of the segregating  
249 plants showed inheritance of the edited allele ([Figure 3D](#) and [Supplemental Figure 7](#)). The  
250 offspring segregated from the #C1.4 event were analyzed in detail. Five dark purple plants  
251 (C1.4.1-C1.4.5, homozygous for the ANT1 HDR-edited allele, [Supplemental Figure 8](#)), six  
252 pale purple plants (C1.4.30-C1.4.35, heterozygous for the ANT1 HDR-edited allele,  
253 [Supplemental Figure 8](#)), and two wild-type-like plants did not contain the HDR-edited allele,  
254 as expected ([Figure 3D](#), predicted results correlated with phenotypes). The dark purple plants  
255 showed PCR amplification from the replaced allele but no amplification of the wild-type  
256 allele when PCR was performed using primers flanking the editing site ([Figure 1A](#)). In  
257 contrast, heterozygous and wild-type plants showed a band corresponding to the wild-type  
258 allele. Further assessment indicated that the GE2 offspring of the homozygous GE1 plants  
259 were all dark purple, and the back-crossed (to WT female as pollen acceptors) BC1F1  
260 generation all showed the pale purple phenotype ([Supplemental Figure 8](#)), suggesting the  
261 feasibility of recovering the parental genetic background via backcrossing in cases of  
262 unexpected modification, including off-target effects. Sanger sequencing revealed perfect  
263 inheritance of the HDR-edited allele from the GE0 generation of event C1.4 ([Supplemental](#)  
264 [Figure 9](#)) to its homozygous offspring. These data also showed no amplification of circular  
265 forms of the DNA replicon ([Figure 3D](#) and [Supplemental Figure 7](#)), indicating that the GE1  
266 plants were also free of the replicons.

## 267 **Practical successful editing by HDR using marker-free approaches**

268 To show the applicability of our HDR system to practical plant genome editing, we sought to  
269 use it to edit a potentially agronomic trait, and salinity tolerance was chosen as the target trait.  
270 High-affinity K<sup>+</sup> Transporter 1;2 (HKT1;2) plays an important role in the maintenance of K<sup>+</sup>  
271 uptake under salt stress (Ali et al., 2012). Salinity tolerance was determined by a single N/D  
272 variant (N217D in tomato) in the pore region of HKT1;2, which determines selectivity for  
273 Na<sup>+</sup> and K<sup>+</sup> (Ali et al., 2016). We succeeded in generating a heterozygous but perfect HDR  
274 GE0 event to produce the salt-tolerant allele (N217D) (Ali et al., 2016) ([Figure 4A](#),  
275 [Supplemental Table 6](#)) according to the analysis of 150 events (~0.66%) using our system  
276 with a *HKT1;2* gene donor template that included neither an antibiotic selection marker nor an  
277 ANT1 color marker ([Figure 4B](#)). The CRISPR/LbCpf1 system was very effective for NHEJ  
278 repair because it generated indel mutation rates of up to 72% in multiple mutation patterns  
279 decomposed by ICE Synthego software (Hsiau et al., 2019) ([Supplemental Figure 10A and B](#)),  
280 in which most of the events resulted in 47-97% cells carrying indel sequences ([ICE score](#),  
281 [Supplemental Table 7](#)). In comparison with the first report on the marker-free gene targeting  
282 of the CRTISO allele (Dahan-Meir et al., 2018), this efficiency was much lower, possibly due  
283 to (1) lower cutting activity (note the indel rates in [Supplemental Table 7](#)), (2) a different  
284 target site context or (3) the use of a different strategy to express Rep/RepA (Dahan-Meir and  
285 coworkers used a replicon tool with Rep expression driven by a CaMV35S promoter from  
286 outside of LIR-SIR-LIR boundary), or to unknown reasons associated with the CRTISO alleles,  
287 as claimed by the authors, or all of the above-mentioned factors. We used a similar replicon tool  
288 to that reported by Dahan-Meir and coworkers (2018) for ANT1 targeting via the HDR pathway  
289 in this study but obtained significantly lower HDR efficiencies than were obtained with the  
290 pHR01 tool (data not shown).

291 The editing event involving the D217 allele resulted in a normal morphology (Figure 4C) and  
292 normally set fruits (Supplemental Figure 11) compared to WT. It should be noted that the  
293 mutated nucleotide (A to G) of *HKT1;2* is not accessible by any currently known base editor  
294 (BE), including xCas9-ABE (Hu et al., 2018), highlighting the significance of HDR-based  
295 genome editing. We tested the self-pollinated GE1 generation of the plants obtained from the  
296 event and observed up to 100 mM NaCl tolerance at the germination stage (Figure 5A) in  
297 homozygous as well as heterozygous plants. The salt-tolerant plants showed a 3-4-day delay  
298 in germination compared to the mock controls but grew normally in NaCl-containing medium  
299 (Figure 5A) and later fully recovered in soil (Figure 5B). Screening for the presence of HDR  
300 allele(s) in the tested plants via the cleaved amplified polymorphic sequence (CAPS) method  
301 showed allele segregation following Mendelian rules (Figure 5C). The true *HKT1;2* N217D  
302 HDR alleles in the GE1 plants were ultimately confirmed by Sanger sequencing. Furthermore,  
303 we successfully generated HDR-based SIEPS1 events with an ~1% efficiency using this  
304 replicon system without using herbicide for selection (data not shown), thereby validating the  
305 feasibility of our replicon systems for practical applications. It is worth noting that most of the  
306 elite alleles in plants do not associate with any marker, and hence, a highly efficient marker-free  
307 system is in high demand.

308 Thus, through the application of various approaches, our study showed a large improvement  
309 of HDR efficiency in tomato somatic cells. The HDR allele was stably inherited in subsequent  
310 generations obtained via self-pollination and backcrossing. The advancement of HDR in  
311 somatic cells and the generation of replicon-free HDR-edited plants in the GE0 generation  
312 open the door for practical applications of the technique to improve crop traits, with special  
313 interest for asexually reproducing crops.

## 314 **MATERIALS AND METHODS**

### 315 **Construction and cloning of HDR testing systems**

316 The entire design principle and all cloning procedures followed MoClo (Weber et al., 2011)  
317 and Golden Gate (Engler et al., 2014) protocols. pLSL.R. Ly was designed by amplifying the  
318 long intergenic region (LIR), short intergenic region (SIR) and lycopene marker from the  
319 pLSLR plasmid (Cermak et al., 2015) and was cloned following the order shown in  
320 [Supplemental Figure 2A](#). Level 2 Golden Gate BpiI restriction sites flanking the pink marker  
321 gene (lycopene) were also integrated within the replicon for the cloning of HDR expression  
322 cassettes. The release of circularized DNA replicons was validated in tomato leaves  
323 ([Supplemental Figure 2B](#)) as well as tomato cotyledon explants (data not shown). The  
324 pTC147 and pTC217 plasmids (Cermak et al., 2015) were obtained from Addgene and used as  
325 a reference. The LbCpf1-based HDR replicons were designed and cloned similarly to the  
326 SpCas9-based constructs, with two guide RNAs (LbCpf1\_gRNA1 and LbCpf1\_gRNA2,  
327 [Figure 1A](#)). Donor DNAs (ANT1D2) were constructed for the integration of an antibiotic  
328 selection marker (NptII) and the insertion of a CaMV 35S promoter to drive overexpression of  
329 the ANT1 gene (pANT1<sup>ox</sup>, [Figure 1A](#)). The dual-guide RNA construct was designed by  
330 multiplexing the LbCpf1 crRNAs as a tandem repeat of scaffold RNA followed by 23 nt guide  
331 RNA sequences. The crRNAs were driven by an AtU6 promoter (Kamoun Lab, Addgene  
332 #46968) and terminated by 7-T chain sequences.

### 333 **Tomato transformation**

334 Our study of HDR improvement was conducted using tomato (Hongkwang cultivar, a local  
335 variety) as a model plant. All the binary vectors were transformed into *Agrobacterium*

336 *tumefaciens* GV3101 (pMP90) using electroporation. *Agrobacterium*-mediated transformation  
337 was used to deliver editing tools to tomato cotyledon fragments ([Supplemental Figure 12](#)).  
338 Explants for transformation were prepared from 7-day-old cotyledons. Sterilized seeds of the  
339 Hongkwang cultivar were grown in MSO medium (half-strength MS medium containing 30  
340 g/L of sucrose, pH 5.8) at 25±2°C under 16-hour/8-hour light/dark conditions. Seven-day-old  
341 seedlings were collected, and their cotyledonary leaves were sliced into 0.2-0.3 cm fragments.  
342 The fragments (explants) were pretreated in PREMC medium [MS basal salts, Gamborg B5  
343 vitamins, 2.0 mg/L of Zeatin trans isomer and 0.2 mg/L of indolyl acetic acid (IAA), 1 mM of  
344 putrescine and 30 g/L of glucose, pH 5.7] for 1 day. The precultured explants were then  
345 pricked and transformed using *A. tumefaciens* GV3101::pMP90 cells carrying HR construct(s).

346 *A. tumefaciens* GV3101::pMP90 cells were grown in primary culture overnight (LB  
347 containing suitable antibiotics) in a shaking incubator at 30°C. Agrobacteria were then  
348 collected from the culture (OD 0.6-0.8) by centrifugation. The cells were resuspended in  
349 liquid ABM-MS (pH 5.2) and 200 µM acetosyringone. Transformation was carried out for 25  
350 min at RT. The explants were then transferred to cocultivation medium containing all of the  
351 components in the ABM-MS medium and 200 µM acetosyringone, pH 5.8. The cocultivation  
352 plates were kept in the darkness at 25°C for 2 days, and the explants were then shifted to  
353 nonselection medium (NSEL) for 5 days and subcultured in selection medium (SEL5). The  
354 nonselection and selection media contained all of the components of the preculture medium as  
355 well as 300 mg/L of timentin and 80 mg/L of kanamycin. Subculture of the explants was  
356 carried out at 14-day intervals to achieve the best regeneration efficiency. Explants containing  
357 purple calli or shoots were then transferred to SEL5R medium (similar to SEL5 but with the  
358 zeatin trans isomer concentration reduced to 1.0 mg/L) for further regeneration and/or



359 elongation. When the shoots were sufficiently long (1.5-3.0 cm), they were transferred to  
360 rooting medium (containing all of the components of the elongation medium the except zeatin  
361 trans isomer plus 1.0 mg/L IBA) to generate intact plants. The intact plants from the rooting  
362 medium were transferred to vermiculite pots to allow them to harden before shifting them to  
363 soil pots in a greenhouse with a temperature of  $26\pm 2^{\circ}\text{C}$  under a 16 h/8 h photoperiod. The  
364 experimental treatment of the physical conditions and data collection were conducted as  
365 described in [Supplemental Figure 12](#).

### 366 **HDR efficiency calculation**

367 In a previous report, the HDR efficiency calculated by dividing the number of explants  
368 containing at least one purple callus (appearing as a purple spot) by the total number of explants  
369 obtained from *Agrobacterium*-mediated transformation reached 12% with the replicon system  
370 (Cermak et al., 2015). In the present study, HDR efficiencies were calculated differently by  
371 normalization of the purple spot numbers per cotyledon fragment obtained using genome  
372 editing constructs to the purple spot numbers per cotyledon fragment counted in case of  
373 transformation of the SIANT1 overexpression cassette (pTC147 and pANT1<sup>ox</sup>, [Figure 1B](#)) in  
374 the same conditions.

### 375 **Plant genomic DNA isolation**

376 Tomato genomic DNA isolation was performed using the DNeasy Plant Mini Kit (Qiagen,  
377 USA) according to the manufacturer's protocol. Approximately 200 mg of leaf tissue was  
378 crushed in liquid nitrogen using a ceramic mortar and pestle and processed with the kit.  
379 Genomic DNA was eluted from the mini spin column with 50-80  $\mu\text{l}$  of TE or nuclease-free  
380 water.

## 381 HDR event evaluation

382 The assessment of gene targeting junctions was performed by conventional PCR using  
383 primers flanking the left (UPANT1-F1/NptII-R1) and right (ZY010F/TC140R (Cermak et al.,  
384 2015) ([Supplemental Table 3](#) and [4](#)) junctions and a high-fidelity Taq DNA polymerase  
385 (Phusion Taq, Thermo Fisher Scientific, USA) and Sanger sequencing (Solgent, Korea). DNA  
386 amplicons and related donor template levels were evaluated by semiquantitative PCR and  
387 qPCR (using KAPA SYBR FAST qPCR Kits, Sigma-Aldrich, USA), respectively, using  
388 primers specific to only circularized replicons and the donor template. Additionally, the qPCR  
389 assays were designed and conducted following MIQE's guidelines, with SIPDS (Solyc03  
390 g123760) and SIEF1 (Solyc07 g016150) as normalized controls. Analyses of the inherited  
391 behavior of the HDR-edited allele were performed with genome-edited generation 1 (GE1) by  
392 PCR and Sanger sequencing. Circularized replicons were detected using PCR with the  
393 corresponding primers for pHR01 ([Supplemental Table 3](#)), multiple replicons ([Supplemental](#)  
394 [Table 2](#)) or pTC217 ([Supplemental Table 4](#)).

## 395 Statistical analyses

396 HDR efficiencies were recorded in at least three replicates and were statistically analyzed and  
397 plotted using PRISM 7.01 software. In [Figure 1C](#), multiple comparisons of the HDR  
398 efficiencies of the other constructs with that of pRep<sup>-</sup> were performed by one-way ANOVA  
399 (uncorrected Fisher LSD test, n=3, df=2, t=4.4; 4.4 and 1.5 for pTC217; pHR01 and pGRNA<sup>-</sup>,  
400 respectively). In [Figure 1E](#), pairwise comparisons of the HDR efficiencies of pTC217 and  
401 pHR01 under the three lighting conditions were performed with Student's t-test (DD: t=1.222,  
402 df=4; 8 L/16 D: t=2.424, df=7 and 16 L/8 D: t=3.059, df=4). In [Figure 1F](#), comparisons of the

403 HDR efficiencies of pTC217 and pHR01 in the various temperature conditions were  
404 performed with Student's t-test (19°C:  $t=2.656$ ,  $df=2$ ; 25°C:  $t=3.346$ ,  $df=2$ ; 28°C:  $t=2.099$ ,  
405  $df=5$ ; 31°C:  $t=4.551$ ,  $df=2$ ). In [Figure 2B](#), comparisons of the HDR efficiencies of the other  
406 multiple replicon tools with pHR01 were performed with Student's test (MR01:  $t=3.648$ ,  $df=3$ ;  
407 MR02:  $t=6.041$ ,  $df=3$ ; MR03:  $t=2.032$ ,  $df=3$ ; MR04:  $t=1.893$ ,  $df=3$ ).

## 408 **FUNDING**

409 This work was supported by the National Research Foundation of Korea (Grant NRF  
410 2017R1A4A1015515) and by the Next-Generation BioGreen 21 Program (SSAC, Grant  
411 PJ01322601), Rural Development Administration (RDA), Republic of Korea.

## 412 **AUTHOR CONTRIBUTIONS**

413 T.V.V., V.S. and J.Y.K. designed the experiments; T.V.V., V.S., E.J.K., M.T.T., J.K., Y.W.S.,  
414 D.T.H.D and M.P. performed the experiments; T.V.V. and J.Y.K. analyzed the results; T.V.V.  
415 and J.Y.K. wrote the manuscript.

## 416 **COMPETING INTERESTS**

417 The authors have submitted a Korean patent application (application no. 10-2018-0007579)  
418 based on the results reported in this paper.

## 419 **ACKNOWLEDGMENTS**

420 We wish to thank Mrs. Jeong Se Jeong and Mrs. Hyun Jeong Kim for their valuable technical  
421 support in this study.

422 **REFERENCES**

423 Ali, A., Raddatz, N., Aman, R., Kim, S., Park, H.C., Jan, M., Baek, D., Khan, I.U., Oh, D.H.,  
424 Lee, S.Y., *et al.* (2016). A Single Amino-Acid Substitution in the Sodium Transporter HKT1  
425 Associated with Plant Salt Tolerance. *Plant Physiol* 171, 2112-2126.

426 Ali, Z., Park, H.C., Ali, A., Oh, D.H., Aman, R., Kropornicka, A., Hong, H., Choi, W.,  
427 Chung, W.S., Kim, W.Y., *et al.* (2012). TsHKT1;2, a HKT1 homolog from the extremophile  
428 Arabidopsis relative *Thellungiella salsuginea*, shows K(+) specificity in the presence of NaCl.  
429 *Plant Physiol* 158, 1463-1474.

430 Baltes, N.J., Gil-Humanes, J., Cermak, T., Atkins, P.A., and Voytas, D.F. (2014). DNA  
431 replicons for plant genome engineering. *Plant Cell* 26, 151-163.

432 Barbosa, C., Peixeiro, I., and Romao, L. (2013). Gene expression regulation by upstream  
433 open reading frames and human disease. *PLoS Genet* 9, e1003529.

434 Barrangou, R., and Doudna, J.A. (2016). Applications of CRISPR technologies in research  
435 and beyond. *Nat Biotechnol* 34, 933-941.

436 Belhaj, K., Chaparro-Garcia, A., Kamoun, S., and Nekrasov, V. (2013). Plant genome editing  
437 made easy: targeted mutagenesis in model and crop plants using the CRISPR/Cas system. *Plant*  
438 *Methods* 9, 39.

439 Boyko, A., Filkowski, J., and Kovalchuk, I. (2005). Homologous recombination in plants is  
440 temperature and day-length dependent. *Mutat Res* 572, 73-83.

441 Butler, N.M., Baltes, N.J., Voytas, D.F., and Douches, D.S. (2016). Geminivirus-Mediated  
442 Genome Editing in Potato (*Solanum tuberosum* L.) Using Sequence-Specific Nucleases. *Front*  
443 *Plant Sci* 7, 1045.

- 444 Cermak, T., Baltes, N.J., Cegan, R., Zhang, Y., and Voytas, D.F. (2015). High-frequency,  
445 precise modification of the tomato genome. *Genome Biol* *16*, 232.
- 446 Christie, M., Croft, L.J., and Carroll, B.J. (2011). Intron splicing suppresses RNA silencing  
447 in *Arabidopsis*. *Plant J* *68*, 159-167.
- 448 Dahan-Meir, T., Filler-Hayut, S., Melamed-Bessudo, C., Bocobza, S., Czosnek, H., Aharoni,  
449 A., and Levy, A.A. (2018). Efficient in planta gene targeting in tomato using geminiviral  
450 replicons and the CRISPR/Cas9 system. *Plant J* *95*, 5-16.
- 451 Endo, M., Mikami, M., and Toki, S. (2016). Biallelic Gene Targeting in Rice. *Plant Physiol*  
452 *170*, 667-677.
- 453 Engler, C., Youles, M., Gruetzner, R., Ehnert, T.M., Werner, S., Jones, J.D., Patron, N.J., and  
454 Marillonnet, S. (2014). A golden gate modular cloning toolbox for plants. *ACS Synth Biol* *3*,  
455 839-843.
- 456 Fauser, F., Roth, N., Pacher, M., Ilg, G., Sanchez-Fernandez, R., Biesgen, C., and Puchta, H.  
457 (2012). In planta gene targeting. *Proc Natl Acad Sci U S A* *109*, 7535-7540.
- 458 Ferguson, D.O., and Alt, F.W. (2001). DNA double strand break repair and chromosomal  
459 translocation: lessons from animal models. *Oncogene* *20*, 5572-5579.
- 460 Gil-Humanes, J., Wang, Y., Liang, Z., Shan, Q., Ozuna, C.V., Sanchez-Leon, S., Baltes, N.J.,  
461 Starker, C., Barro, F., Gao, C., *et al.* (2017). High-efficiency gene targeting in hexaploid wheat  
462 using DNA replicons and CRISPR/Cas9. *Plant J* *89*, 1251-1262.
- 463 Gutierrez, C. (1999). Geminivirus DNA replication. *Cell Mol Life Sci* *56*, 313-329.
- 464 Hanley-Bowdoin, L., Bejarano, E.R., Robertson, D., and Mansoor, S. (2013). Geminiviruses:  
465 masters at redirecting and reprogramming plant processes. *Nat Rev Microbiol* *11*, 777-788.

466 Hickey, L.T., A, N.H., Robinson, H., Jackson, S.A., Leal-Bertioli, S.C.M., Tester, M., Gao,  
467 C., Godwin, I.D., Hayes, B.J., and Wulff, B.B.H. (2019). Breeding crops to feed 10 billion. *Nat*  
468 *Biotechnol.*

469 Hsiao, T., Conant, D., Maures, T., Waite, K., Yang, J., Kelso, R., Holden, K., Enzmann, B.L.,  
470 and Stoner, R. (2019). Inference of CRISPR Edits from Sanger Trace Data. *bioRxiv*, 251082.

471 Hsu, P.D., Lander, E.S., and Zhang, F. (2014). Development and applications of CRISPR-  
472 Cas9 for genome engineering. *Cell* *157*, 1262-1278.

473 Hu, J.H., Miller, S.M., Geurts, M.H., Tang, W., Chen, L., Sun, N., Zeina, C.M., Gao, X.,  
474 Rees, H.A., Lin, Z., *et al.* (2018). Evolved Cas9 variants with broad PAM compatibility and high  
475 DNA specificity. *Nature* *556*, 57-63.

476 Hummel, A.W., Chauhan, R.D., Cermak, T., Mutka, A.M., Vijayaraghavan, A., Boyher, A.,  
477 Starker, C.G., Bart, R., Voytas, D.F., and Taylor, N.J. (2018). Allele exchange at the EPSPS  
478 locus confers glyphosate tolerance in cassava. *Plant Biotechnol J* *16*, 1275-1282.

479 Jiang, W., Zhou, H., Bi, H., Fromm, M., Yang, B., and Weeks, D.P. (2013). Demonstration  
480 of CRISPR/Cas9/sgRNA-mediated targeted gene modification in Arabidopsis, tobacco, sorghum  
481 and rice. *Nucleic Acids Res* *41*, e188.

482 Jinek, M., Chylinski, K., Fonfara, I., Hauer, M., Doudna, J.A., and Charpentier, E. (2012). A  
483 programmable dual-RNA-guided DNA endonuclease in adaptive bacterial immunity. *Science*  
484 *337*, 816-821.

485 Kaliappan, K., Choudhury, N.R., Suyal, G., and Mukherjee, S.K. (2012). A novel role for  
486 RAD54: this host protein modulates geminiviral DNA replication. *FASEB J* *26*, 1142-1160.

487 Kozak, M. (1981). Possible role of flanking nucleotides in recognition of the AUG initiator  
488 codon by eukaryotic ribosomes. *Nucleic Acids Res* *9*, 5233-5252.

- 489 LeBlanc, C., Zhang, F., Mendez, J., Lozano, Y., Chatpar, K., Irish, V.F., and Jacob, Y.  
490 (2018). Increased efficiency of targeted mutagenesis by CRISPR/Cas9 in plants using heat stress.  
491 *Plant J* 93, 377-386.
- 492 Li, S., Li, J., Zhang, J., Du, W., Fu, J., Sutar, S., Zhao, Y., and Xia, L. (2018). Synthesis-  
493 dependent repair of Cpf1-induced double strand DNA breaks enables targeted gene replacement  
494 in rice. *J Exp Bot* 69, 4715-4721.
- 495 Mor, T.S., Moon, Y.S., Palmer, K.E., and Mason, H.S. (2003). Geminivirus vectors for high-  
496 level expression of foreign proteins in plant cells. *Biotechnol Bioeng* 81, 430-437.
- 497 Moreno-Mateos, M.A., Fernandez, J.P., Rouet, R., Vejnar, C.E., Lane, M.A., Mis, E.,  
498 Khokha, M.K., Doudna, J.A., and Giraldez, A.J. (2017). CRISPR-Cpf1 mediates efficient  
499 homology-directed repair and temperature-controlled genome editing. *Nat Commun* 8, 2024.
- 500 Needham, P.D., Atkinson, R.G., Morris, B.A.M., Gardner, R.C., and Gleave, A.P. (1998).  
501 GUS expression patterns from a tobacco yellow dwarf virus-based episomal vector. *Plant Cell*  
502 *Rep* 17, 631-639.
- 503 Nekrasov, V., Staskawicz, B., Weigel, D., Jones, J.D., and Kamoun, S. (2013). Targeted  
504 mutagenesis in the model plant *Nicotiana benthamiana* using Cas9 RNA-guided endonuclease.  
505 *Nat Biotechnol* 31, 691-693.
- 506 Petukhova, G., Van Komen, S., Vergano, S., Klein, H., and Sung, P. (1999). Yeast Rad54  
507 promotes Rad51-dependent homologous DNA pairing via ATP hydrolysis-driven change in  
508 DNA double helix conformation. *J Biol Chem* 274, 29453-29462.
- 509 Puchta, H. (2005). The repair of double-strand breaks in plants: mechanisms and  
510 consequences for genome evolution. *J Exp Bot* 56, 1-14.

511 Puchta, H., Dujon, B., and Hohn, B. (1993). Homologous recombination in plant cells is  
512 enhanced by in vivo induction of double strand breaks into DNA by a site-specific endonuclease.  
513 *Nucleic Acids Res* 21, 5034-5040.

514 Puchta, H., Dujon, B., and Hohn, B. (1996). Two different but related mechanisms are used  
515 in plants for the repair of genomic double-strand breaks by homologous recombination. *Proc*  
516 *Natl Acad Sci U S A* 93, 5055-5060.

517 Richardson, C., Moynahan, M.E., and Jasin, M. (1998). Double-strand break repair by  
518 interchromosomal recombination: suppression of chromosomal translocations. *Genes Dev* 12,  
519 3831-3842.

520 Richter, K.S., Kleinow, T., and Jeske, H. (2014). Somatic homologous recombination in  
521 plants is promoted by a geminivirus in a tissue-selective manner. *Virology* 452-453, 287-296.

522 Richter, K.S., Serra, H., White, C.I., and Jeske, H. (2016). The recombination mediator  
523 RAD51D promotes geminiviral infection. *Virology* 493, 113-127.

524 Sapranaukas, R., Gasiunas, G., Fremaux, C., Barrangou, R., Horvath, P., and Siksnys, V.  
525 (2011). The *Streptococcus thermophilus* CRISPR/Cas system provides immunity in *Escherichia*  
526 *coli*. *Nucleic Acids Res* 39, 9275-9282.

527 Suarez-Lopez, P., and Gutierrez, C. (1997). DNA replication of wheat dwarf geminivirus  
528 vectors: effects of origin structure and size. *Virology* 227, 389-399.

529 Suyal, G., Mukherjee, S.K., and Choudhury, N.R. (2013). The host factor RAD51 is involved  
530 in mungbean yellow mosaic India virus (MYMIV) DNA replication. *Arch Virol* 158, 1931-1941.

531 Szostak, J.W., Orr-Weaver, T.L., Rothstein, R.J., and Stahl, F.W. (1983). The double-strand-  
532 break repair model for recombination. *Cell* 33, 25-35.



533 Townsend, J.A., Wright, D.A., Winfrey, R.J., Fu, F., Maeder, M.L., Joung, J.K., and Voytas,  
534 D.F. (2009). High-frequency modification of plant genes using engineered zinc-finger nucleases.  
535 *Nature* 459, 442-445.

536 Varga, T., and Aplan, P.D. (2005). Chromosomal aberrations induced by double strand DNA  
537 breaks. *DNA Repair (Amst)* 4, 1038-1046.

538 Weber, E., Engler, C., Gruetzner, R., Werner, S., and Marillonnet, S. (2011). A modular  
539 cloning system for standardized assembly of multigene constructs. *PLoS One* 6, e16765.

540 Zetsche, B., Gootenberg, J.S., Abudayyeh, O.O., Slaymaker, I.M., Makarova, K.S.,  
541 Essletzbichler, P., Volz, S.E., Joung, J., van der Oost, J., Regev, A., *et al.* (2015). Cpf1 is a single  
542 RNA-guided endonuclease of a class 2 CRISPR-Cas system. *Cell* 163, 759-771.

543 Zhang, H., Si, X., Ji, X., Fan, R., Liu, J., Chen, K., Wang, D., and Gao, C. (2018). Genome  
544 editing of upstream open reading frames enables translational control in plants. *Nat Biotechnol*  
545 36, 894-898.

546 Zhang, X., and Mason, H. (2006). Bean Yellow Dwarf Virus replicons for high-level  
547 transgene expression in transgenic plants and cell cultures. *Biotechnol Bioeng* 93, 271-279.

## 548 **FIGURE LEGENDS**

### 549 **Figure 1. HDR-based genome editing of the ANT1 locus.**

550 (A) Representatives of ANT1 targeting sites and homologous DNA donor template  
551 construction. The upstream sequence of the ANT1 locus (middle panel) was selected for  
552 targeting by HDR. The kanamycin expression cassette (pNOS-NptII-tOCS) and CaMV 35S  
553 promoter were designed to be inserted at a position 142 bp upstream of the ANT1 start codon.  
554 The cutting sites of the two guide RNAs used in this study are indicated by two black arrows.

555 The sequences of the gRNAs are shown in the bottom panel. The red arrows show the relative  
556 binding sites and orientations of the primers used for analyses of HDR events.

557 **(B)** T-DNA constructs used for HDR improvement experiments. The dual-guide RNA  
558 scaffold (2x1 gRNA<sup>ANT1</sup>) was driven by the *Arabidopsis* U6 promoter core element (75 bp).  
559 The LbCpf1 expression cassette was re-engineered to contain the *Arabidopsis* Ubiquitin 1  
560 intron I downstream of the CaMV 35S promoter and upstream of LbCpf1 and to be terminated  
561 by the CaMV 35S terminator (35S-LbCpf1I-t35S). Red and orange boxes indicate long  
562 intergenic regions and short intergenic regions of geminivirus DNA, respectively. The black  
563 arrow indicates the relevant binding site and orientation of the RRA-R6 primer for subsequent  
564 analyses. The red arrows show the orientation of the ANT1 donor templates.

565 **(C)** Comparison of HDR efficiency between different constructs. Transformed tomato  
566 cotyledon fragments were incubated under continuous darkness at 28°C for the first 10 days  
567 postwashing.

568 **(D)** Representative photographs of HDR-edited T0 events indicated by purple calli (red  
569 arrows) or direct HDR shoot formation (yellow arrow).

570 **(E)** Impact of photoperiod on HDR. The transformed tomato cotyledon fragments were  
571 incubated under different lighting regimes at 28°C for the first 10 days postwashing. DD:  
572 continuous darkness; 8 L/16 D: 8 hours light/16 hours darkness; 16 L/8 D: 16 hour light/8  
573 hours dark.

574 **(F)** HDR efficiencies of the pTC217 and pHR01 constructs obtained at various temperatures.  
575 HDR efficiencies were recorded in at least triplicate and were calculated and plotted using  
576 PRISM 7.01 software (details of the statistical analyses are described in the Methods section).

577 \*: significantly different ( $p < 0.05$ ); ns: not significantly different; p values are shown on the  
578 top of the bars of (E) for comparison. The data in (C), (E) and (F) are represented as the mean  
579  $\pm$  SEM.

580 **Figure 2. Next-generation multiple replicon tools for HDR improvement.**

581 (A) Multireplicon constructs tested for the improvement of HDR over NHEJ. Red and orange  
582 boxes indicate long intergenic regions and short intergenic regions of geminiviral DNA,  
583 respectively.

584 (B) HDR efficiencies obtained using multiple replicons as cargos for the HDR tools. HDR  
585 efficiencies were recorded in triplicate four times and were calculated and plotted using  
586 PRISM 7.01 software (details of the statistical analyses are described in the Materials and  
587 Methods section). p values (pairwise comparisons to pHR01 using Student's test) are shown  
588 on the top of the bars. Data are represented as the mean  $\pm$  SEM.

589 (C) Relatively quantified donor template levels at different time points posttransformation by  
590 qPCR using ANT1D2 template-specific primers normalized to SIPDS.

591 (D) PCR detection of circularized replicons simultaneously released from the MR01 vector.  
592 0d, 3d, 6d and 9d: samples collected at 0, 3, 6 and 9 days posttransformation with  
593 *Agrobacterium* carrying MR01. The primer pairs used in PCR to detect circularized replicons  
594 are shown in [Supplemental Figure 3B](#), bottom panel, and [Supplemental Table 2](#).

595 **Figure 3. Analyses of HDR-edited plants.**

596 (A) Representative HDR-edited plants in greenhouse conditions and their fruits. Scale bars = 1  
597 cm.

598 (B) PCR analysis data of representative HDR-independent events. P: pHR01 plasmid isolated  
599 from *Agrobacteria*; L: 1 kb ladder; N: water control; WT: wild-type tomato Hongkwang; C1.1,

600 C1.2, C1.3, C1.8: independent LbCpf1-based HDR GE0 events. ANT1 control products were  
601 PCR amplified using the TC140F and TC140R primers (Figure 1A) flanking the upstream region  
602 of the ANT1 gene.

603 (C) Generation 1 of HDR-edited events (GE1). GE1 plants (left) germinated in soil in pots in  
604 comparison with wild-type plants (right). Scale bar = 1 cm.

605 (D) PCR analysis data of GE1 offspring resulting from C1.4 events. P: pHR01 plasmid isolated  
606 from Agrobacteria; L: 1 kb ladder; N: water control; WT: wild-type tomato Hongkwang; C1.4.1,  
607 C1.4.2, C1.4.3, C1.4.4 and C1.4.5: GE1 plants showing dark purple color obtained from the self-  
608 pollination of plants from the C1.4 event. ANT1 control products were PCR amplified using the  
609 TC140F and TC140R primers (Figure 1A) flanking the upstream region of the ANT1 gene.

610 **Figure 4. HKT1;2 N217D allele editing by HDR using the CRISPR/Cpf1-based replicon**  
611 **system.**

612 (A) Sanger sequencing of event #C156. Sequence alignment shows the perfectly edited HKT1;2  
613 N217 to D217 allele with the WT allele as a reference. The nucleotides highlighted in the  
614 discontinuous red boxes correspond to intended modifications for N217D, PAM and core  
615 sequences (to avoid recutting).

616 (B) HDR construct layout for HKT1;2 editing. There is neither selection nor a visible marker  
617 integrated into the donor sequence. The *NptII* marker was used for the enrichment of transformed  
618 cells.

619 (C) Morphology of the HKT1;2 N217D edited event compared to its parental WT in greenhouse  
620 conditions. Scale bar = 1 cm.

621 **Figure 5. Evaluation of the GE1 offspring of the HKT1;2 N217D HDR event.**

622 (A) Salinity tolerance test at the germination stage using NaCl. Left panel: GE1 plants obtained  
623 from self-pollination of the plants obtained from event #C156; right panel: WT control. Bar=1  
624 cm.

625 (B) Salt-tolerant plants (right panel) growing in soil showed normal growth compared to WT  
626 (left panel). hm=homozygous for the HKT1;2 N211D allele; ht=heterozygous for the HKT1;2  
627 N217D allele. Bar=1 cm.

628 (C) Screening for the presence of HDR allele(s) in the tested plants via the cleaved amplified  
629 polymorphic sequence (CAPS) method. PCR amplification using primers flanking the targeted  
630 region was conducted. The PCR products were digested with the BpiI enzyme and resolved in a  
631 1% agarose gel. P: Plasmid control; L: 1 kb ladder; WT: wild-type sample; Leaf 1, Leaf 2 and  
632 Leaf 3: samples collected from three different positions (angles) on the C156 plants. 1-9: GE1  
633 plants of C156.

#### 634 **LIST OF SUPPLEMENTAL TABLES**

635 [Supplemental Table 1](#). The increase in HDR by multiple replicon systems

636 [Supplemental Table 2](#). Primers for detecting circularized replicons released by MR01 and  
637 pHR01

638 [Supplemental Table 3](#). Primers for LbCpf1-based HR event analyses

639 [Supplemental Table 4](#). Primers for SpCas9-based HR event analyses

640 [Supplemental Table 5](#). Phenotypic segregation of self-pollinated offspring resulting from  
641 LbCpf1-based HDR events.

642 [Supplemental Table 6](#). Summary of the *SIHKT1;2* HDR experiment.

643 [Supplemental Table 7](#). Indel mutation rates among *HKT12* samples decomposed by ICE

644 Synthego software

## 645 **LIST OF SUPPLEMENTAL FIGURES**

646 **Supplemental Figure 1. Reengineering of the BeYDV Rep coding sequence used in the**  
647 **study.**

648 (A) Reverse complement view of the LIR-Rep/RepA-SIR sequence isolated from pLSLR.

649 (B) Reverse complement view of the LIR-Rep/RepA-SIR sequence in the *de novo*-engineered  
650 replicon used in this study.

651 Upper red font sequences: LIR; bottom red font sequences: SIR; purple sequences: Rep/RepA;  
652 green font: upstream ORF sequence (uORF); the light blue sequence TCCCAA was inserted by  
653 cloning to interrupt uORF and add the Kozak preference sequence.

654 **Supplemental Figure 2. The *de novo*-engineered geminiviral amplicon (named pLSL.R. Ly)**  
655 **and its replication in tomato.**

656 (A) Map of pLSL.R.Ly. The DNA amplicon is defined by its boundary sequences (long  
657 intergenic region, LIR) and a terminated sequence (short intergenic region, SIR). The  
658 replication-associated protein (Rep/RepA) is expressed from the LIR promoter sequence. All of  
659 the expression cassettes of HDR tools were cloned into the vector by replacing the red marker  
660 (Lycopene) using a pair of type IIS restriction enzymes (BpiI, flanking ends are TGCC and  
661 GGGA). Left (LB) and right (RB) denote the borders of a T-DNA.

662 (B) Circularized DNA detection in tomato leaves infiltrated with pLSL.R. Ly compared to those  
663 infiltrated with pLSLR. Agrobacteria containing the plasmids were infiltrated into tomato leaves

664 (Hongkwang cultivar), and infiltrated leaves were collected at 6, 8 and 11 dpi and used for the  
665 detection of circularized DNAs. N: water; P1: positive control for pLSL.R. Ly; positive control  
666 for P2: pLSLR; Cx: Control samples collected at x dpi; Ixy: infiltrated sample number y  
667 collected at x dpi; I11 V: sample collected from leaves infiltrated with pLSLR at 11 dpi. PCR  
668 products obtained using primers specific to GAPDH were used as loading controls.

669 **Supplemental Figure 3. Schematic representation of the system and the released forms of**  
670 **the MR01 multiple replicon system.**

671 Upper panel: The design for the general construction of multiple replicon complexes included  
672 three LIR and three SIR sequences. Middle panel: Representative arrangement of the MR01 tool.  
673 The donor template was cloned in one replicon, and the other components for inducing DSBs  
674 were located the other replicon. Bottom panel: Three replicons would be formed from the MR01.  
675 Primer pairs for detecting circularized replicon 1 (Upr1/pCf. ANT1-R4), replicon 2 (RRA-  
676 R2/35S-R4), and replicon 3 (RRA-R2/pCf. ANT1-R4) are indicated in the map of each replicon.

677 **Supplemental Figure 4. Morphological appearance of GE0 plants**

678 **Supplemental Figure 5. Sanger sequencing data to confirm donor exchanges.**

679 (A) Right junction.

680 (B) Left junction. C1.1, C1.2, C1.3, C1.8, C1.11, C1.12, and C1.17: Independent LbCpf1-based  
681 HDR GE0 events

682 **Supplemental Figure 6. Error-prone repair combining HDR and NHEJ in event #C1.3.**

683 The right junctions (amplified by ZY010F/TC140R) of the events were confirmed to be perfectly  
684 adapted to HDR repair ([Supplemental Figure 5A](#)), but the left junction could not be amplified

685 (using the UPANT1-F1/NptII-R1 primer pair, [Figure 1A](#)). Sequencing of the left junction region  
686 showed a ligation event between the RB of the T-DNA and the 3' break in the upstream ANT1  
687 promoter sequence via NHEJ. Red dotted line: ligation boundary.

688 **Supplemental Figure 7. PCR analyses of GE1 plants obtained from GE0 LbCpf1-based HR**  
689 **events.**

690 P: pHR01 plasmid isolated from Agrobacteria; L: 1 kb ladder; N: water control; WT: wild-type  
691 Hongkwang; C1.6.1-C1.6.5: GE1 offspring of event C1.6.; C1.9.1: GE1 offspring of event C1.9;  
692 C1.10.1 and C1.10.2: GE1 offspring of event C1.10; C1.11.1-C1.11.4: GE1 offspring of event  
693 C1.11; C1.12.1-C1.12.5: GE1 offspring of event C1.12; C1.14.1-C1.14.4: GE1 offspring of  
694 event C1.14; C1.15.1 and C1.15.2: GE1 offspring of event C1.15; C1.16.1-C1.16.4: GE1  
695 offspring of event C1.16.

696 **Supplemental Figure 8. Morphological appearance of GE1 plants**

697 **Supplemental Figure 9. Analyses of left and right junction sequences of GE1 plants.**

698 Sanger sequencing data to confirm donor exchanges for the right (**A**) and left (**B**) junctions of the  
699 GE1 plants are presented.

700 **Supplemental Figure 10. Analyses of indel mutations in HKT12 events.**

701 (A) Alignment of raw sequences obtained from Sanger sequencing. 18/25 events (highlighted in  
702 yellow) showed strong double peaks indicating single/biallelic mutations. Six out of 25 events  
703 showed clear biallelic mutations. C77 showed weak (30%) double peaks. C83 and C105 showed  
704 large truncations. (B) Decomposed sequence of event #C53 obtained with ICE Synthego  
705 software.



706 **Supplemental Figure 11. Morphology of the heterozygous HKT12 D217 event in a mature**  
707 **stage**

708 A plant resulting from the HKT12 D217 event (right) shows a normal morphology and fruit  
709 setting compared to the parental plant (left). Scale bars = 2 cm.

710 **Supplemental Figure 12. Timeline and contents of the *Agro*-mediated transformation**  
711 **protocol used in this work.**

712 The step-by-step protocol is presented with each number in the circles indicating the number of  
713 days after seed sowing (upper panel), and the treatments used in each step are shown in the lower  
714 panel.

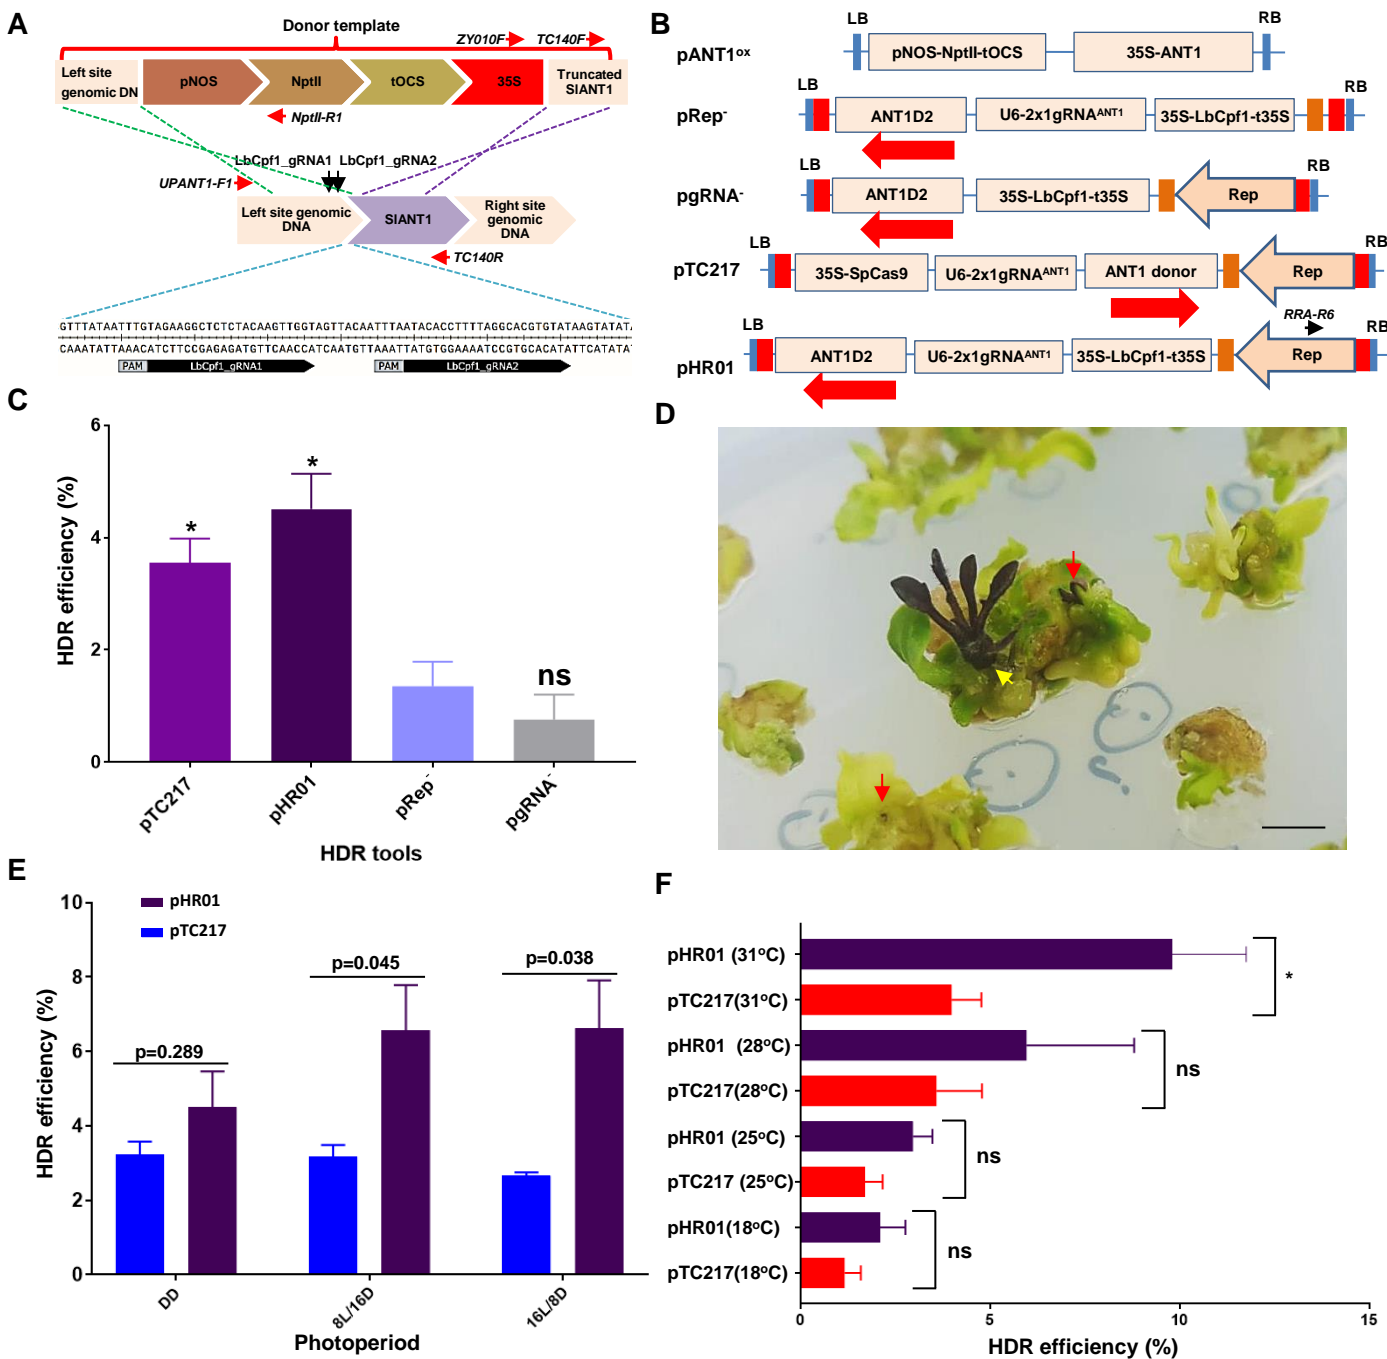

**Figure 1. HDR-based genome editing of the ANT1 locus.**

(A) Representatives of ANT1 targeting sites and homologous DNA donor template construction. The upstream sequence of the ANT1 locus (middle panel) was selected for targeting by HDR. The kanamycin expression cassette (pNOS-NptII-tOCS) and CaMV 35S promoter were designed to be inserted at a position 142 bp upstream of the ANT1 start codon. The cutting sites of the two guide RNAs used in this study are indicated by two black arrows. The sequences of the gRNAs are shown in the bottom panel. The red arrows show the relative binding sites and orientations of the primers used for analyses of HDR events.

(B) T-DNA constructs used for HDR improvement experiments. The dual-guide RNA scaffold (2x1 gRNA<sup>ANT1</sup>) was driven by the *Arabidopsis* U6 promoter core element (75 bp). The LbCpf1 expression cassette was re-engineered to contain the *Arabidopsis* Ubiquitin 1 intron I downstream of the CaMV 35S promoter and upstream of LbCpf1 and to be terminated by the CaMV 35S terminator (35S-LbCpf1-t35S). Red and orange boxes indicate long intergenic regions and short intergenic regions of geminivirus DNA, respectively. The black arrow indicates the relevant binding site and orientation of the RRA-R6 primer for subsequent analyses. The red arrows show the orientation of the ANT1 donor templates.

(C) Comparison of HDR efficiency between different constructs. Transformed tomato cotyledon fragments were incubated under continuous darkness at 28°C for the first 10 days postwashing.

(D) Representative photographs of HDR-edited T0 events indicated by purple calli (red arrows) or direct HDR shoot formation (yellow arrow).

(E) Impact of photoperiod on HDR. The transformed tomato cotyledon fragments were incubated under different lighting regimes at 28°C for the first 10 days postwashing. DD: continuous darkness; 8 L/16 D: 8 hours light/16 hours darkness; 16 L/8 D: 16 hour light/8 hours dark.

(F) HDR efficiencies of the pTC217 and pHR01 constructs obtained at various temperatures.

HDR efficiencies were recorded in at least triplicate and were calculated and plotted using PRISM 7.01 software (details of the statistical analyses are described in the Methods section). \*: significantly different ( $p < 0.05$ ); ns: not significantly different; p values are shown on the top of the bars of (E) for comparison. The data in (C), (E) and (F) are represented as the mean  $\pm$  SEM.

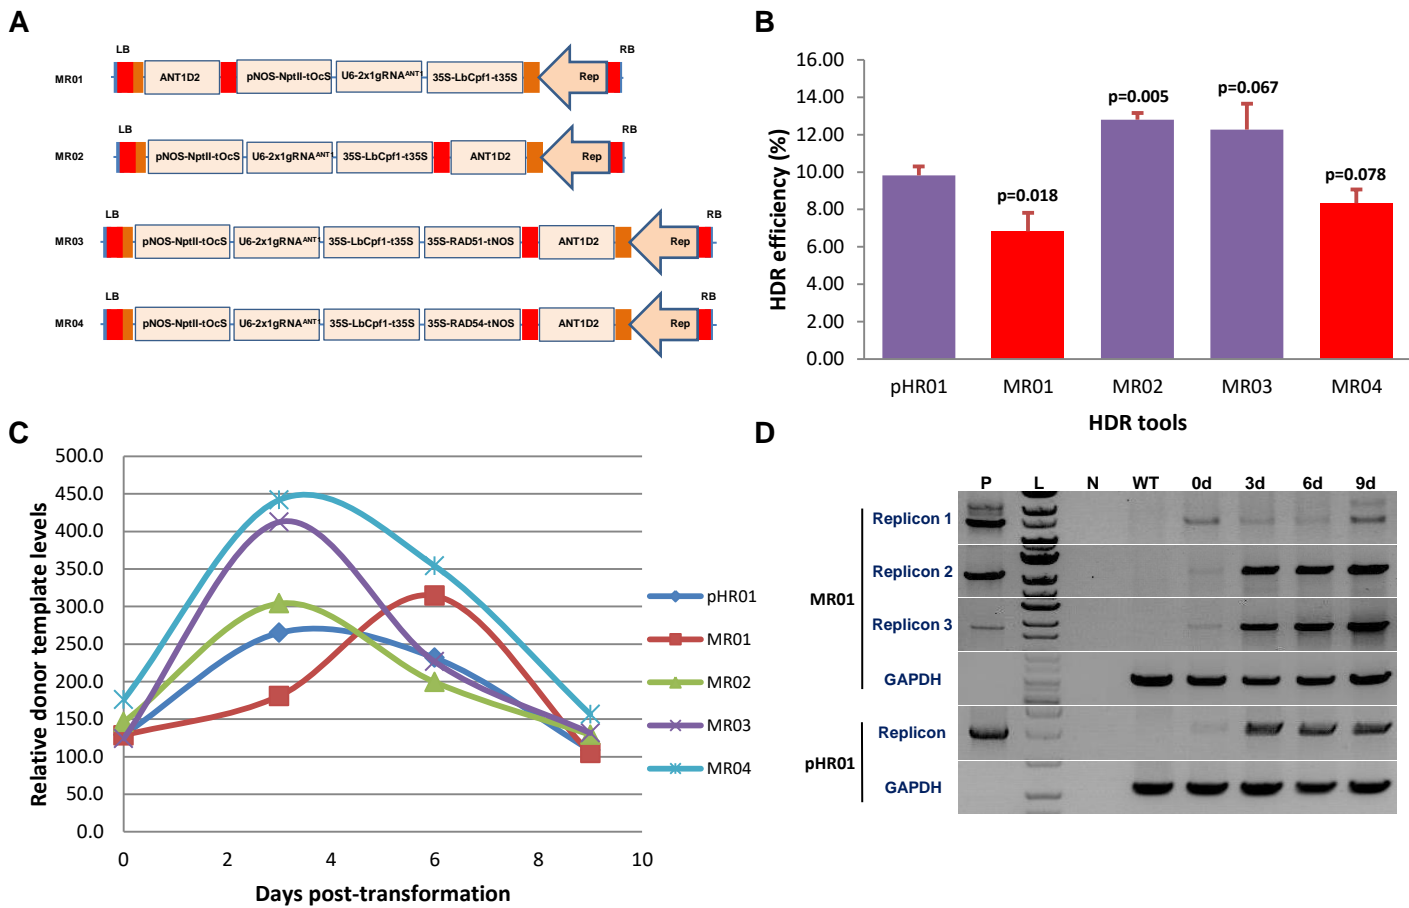

**Figure 2. Next-generation multiple replicon tools for HDR improvement.**

(A) Multireplicon constructs tested for the improvement of HDR over NHEJ. Red and orange boxes indicate long intergenic regions and short intergenic regions of geminiviral DNA, respectively.

(B) HDR efficiencies obtained using multiple replicons as cargos for the HDR tools. HDR efficiencies were recorded in triplicate four times and were calculated and plotted using PRISM 7.01 software (details of the statistical analyses are described in the Materials and Methods section). p values (pairwise comparisons to pHR01 using Student's test) are shown on the top of the bars. Data are represented as the mean  $\pm$  SEM.

(C) Relatively quantified donor template levels at different time points posttransformation by qPCR using ANT1D2 template-specific primers normalized to SIPDS.

(D) PCR detection of circularized replicons simultaneously released from the MR01 vector. 0d, 3d, 6d and 9d: samples collected at 0, 3, 6 and 9 days posttransformation with *Agrobacterium* carrying MR01. The primer pairs used in PCR to detect circularized replicons are shown in Supplemental Figure 3B, bottom panel, and Supplemental Table 2.

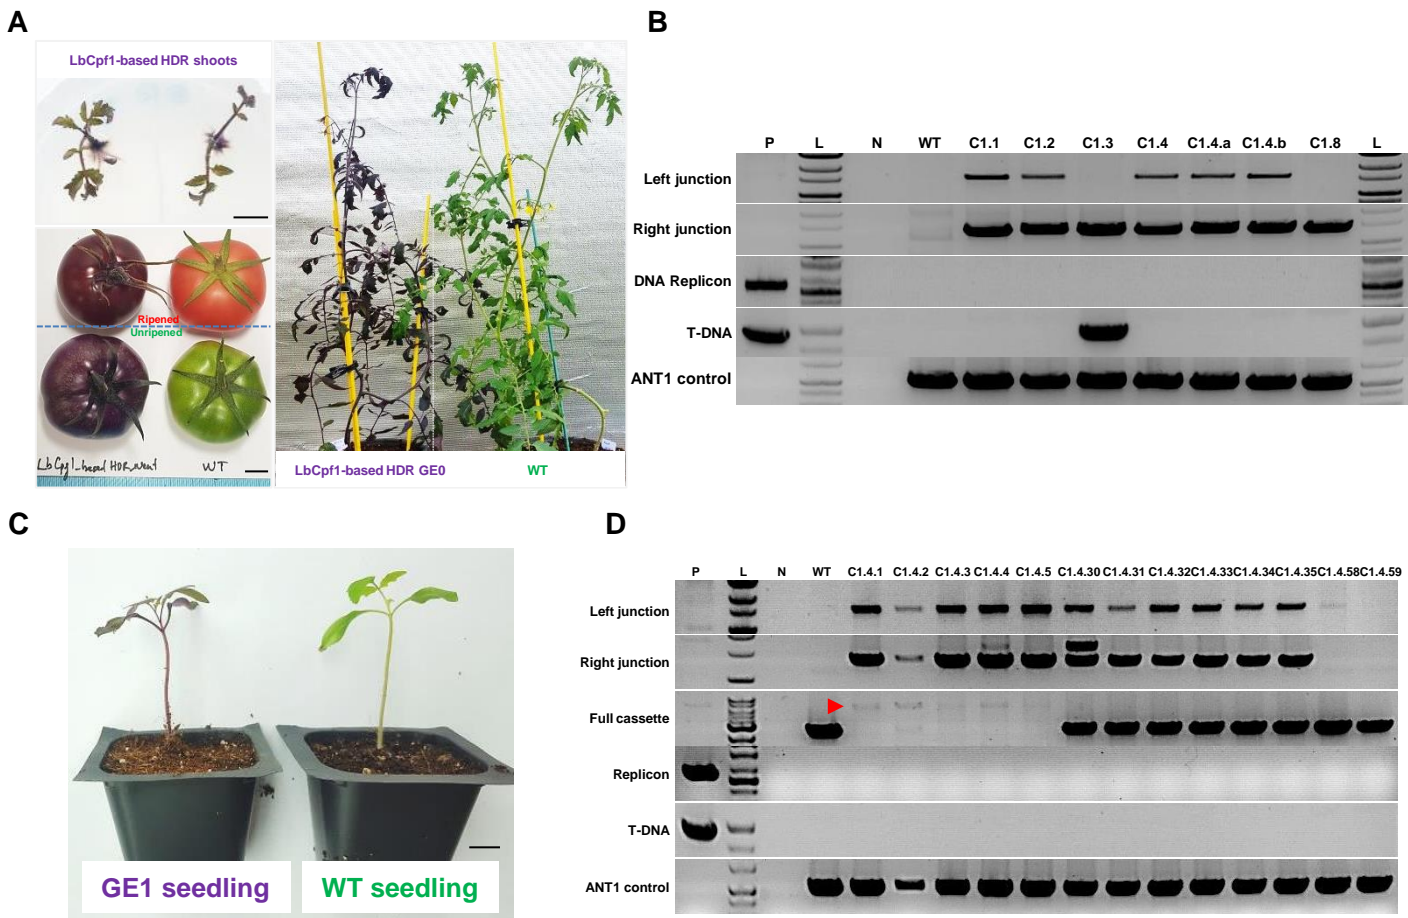

**Figure 3. Analyses of HDR-edited plants.**

(A) Representative HDR-edited plants in greenhouse conditions and their fruits. Scale bars = 1 cm.

(B) PCR analysis data of representative HDR-independent events. P: pHR01 plasmid isolated from *Agrobacterium*; L: 1 kb ladder; N: water control; WT: wild-type tomato Hongkwang; C1.1, C1.2, C1.3, C1.8: independent LbCpf1-based HDR GE0 events. ANT1 control products were PCR amplified using the TC140F and TC140R primers (Figure 1A) flanking the upstream region of the ANT1 gene.

(C) Generation 1 of HDR-edited events (GE1). GE1 plants (left) germinated in soil in pots in comparison with wild-type plants (right). Scale bar = 1 cm.

(D) PCR analysis data of GE1 offspring resulting from C1.4 events. P: pHR01 plasmid isolated from *Agrobacterium*; L: 1 kb ladder; N: water control; WT: wild-type tomato Hongkwang; C1.4.1, C1.4.2, C1.4.3, C1.4.4 and C1.4.5: GE1 plants showing dark purple color obtained from the self-pollination of plants from the C1.4 event. ANT1 control products were PCR amplified using the TC140F and TC140R primers (Figure 1A) flanking the upstream region of the ANT1 gene.

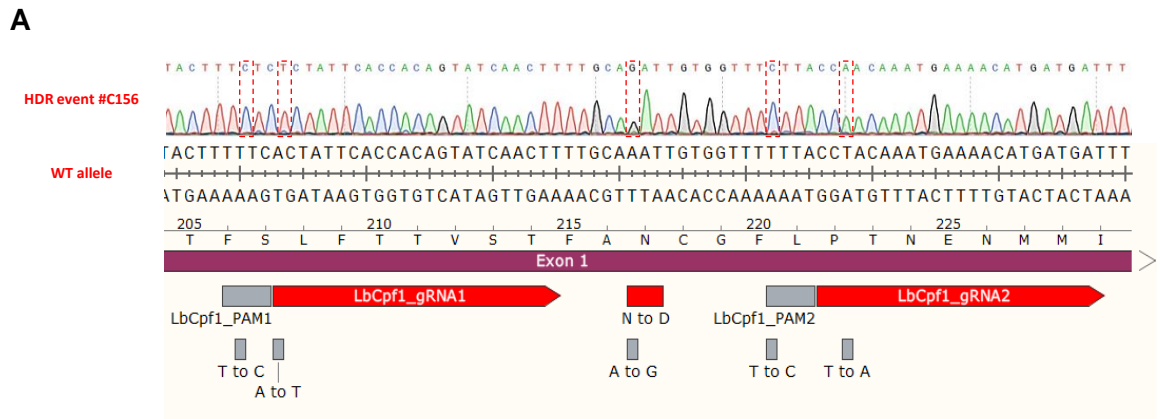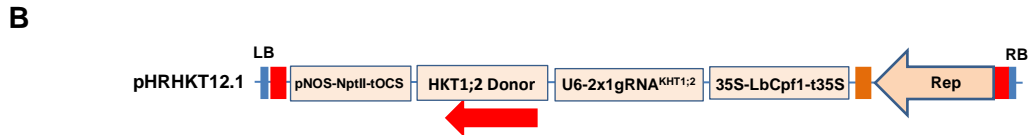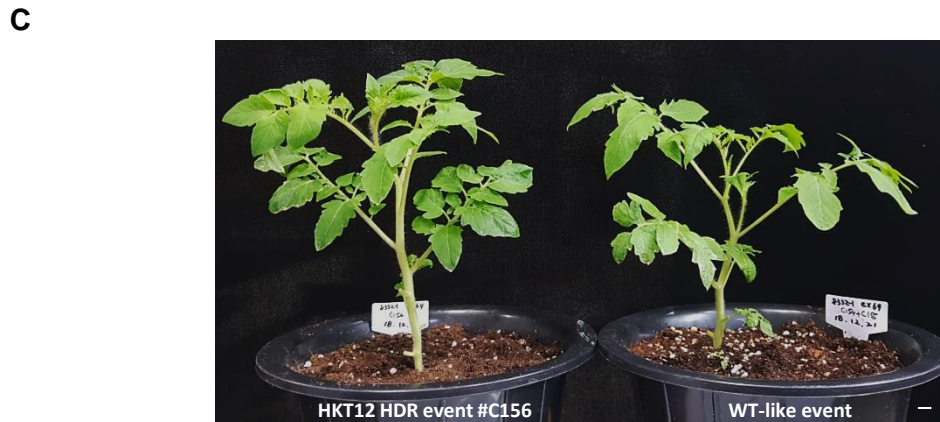

**Figure 4. HKT1;2 N217D allele editing by HDR using the CRISPR/Cpf1-based replicon system.**

(A) Sanger sequencing of event #C156. Sequence alignment shows the perfectly edited HKT1;2 N217 to D217 allele with the WT allele as a reference. The nucleotides highlighted in the discontinuous red boxes correspond to intended modifications for N217D, PAM and core sequences (to avoid recutting).

(B) HDR construct layout for HKT1;2 editing. There is neither selection nor a visible marker integrated into the donor sequence. The *NptII* marker was used for the enrichment of transformed cells.

(C) Morphology of the HKT1;2 N217D edited event compared to its parental WT in greenhouse conditions. Scale bar = 1 cm.

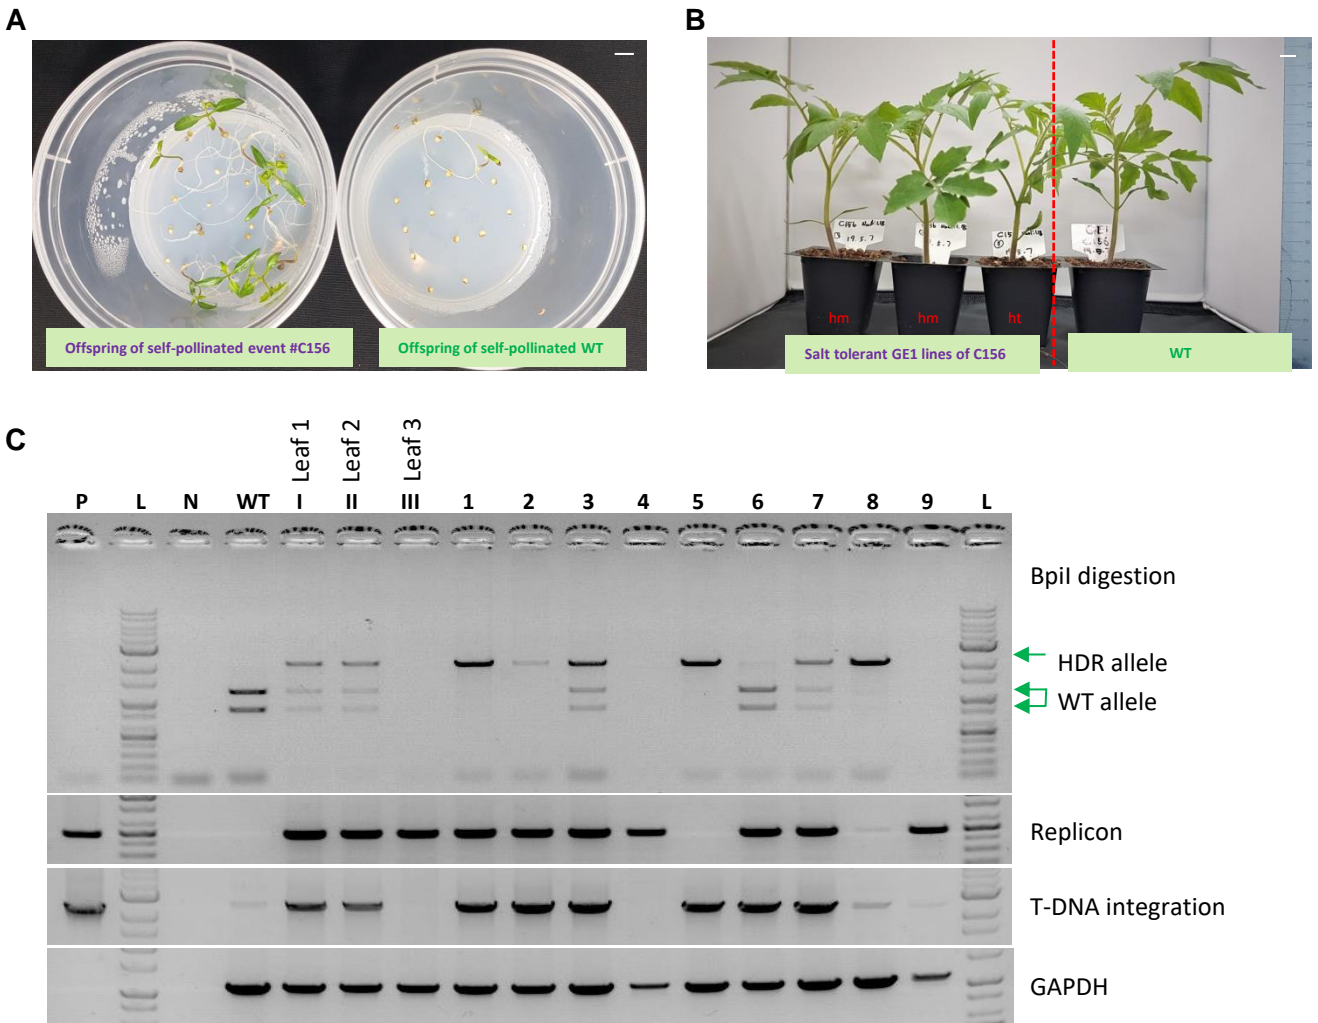

**Figure 5. Evaluation of the GE1 offspring of the HKT1;2 N217D HDR event.**

(A) Salinity tolerance test at the germination stage using NaCl. Left panel: GE1 plants obtained from self-pollination of the plants obtained from event #C156; right panel: WT control. Bar=1 cm.

(B) Salt-tolerant plants (right panel) growing in soil showed normal growth compared to WT (left panel). hm=homozygous for the HKT1;2 N211D allele; ht=heterozygous for the HKT1;2 N217D allele. Bar=1 cm.

(C) Screening for the presence of HDR allele(s) in the tested plants via the cleaved amplified polymorphic sequence (CAPS) method. PCR amplification using primers flanking the targeted region was conducted. The PCR products were digested with the Bpil enzyme and resolved in a 1% agarose gel. P: Plasmid control; L: 1 kb ladder; WT: wild-type sample; Leaf 1, Leaf 2 and Leaf 3: samples collected from three different positions (angles) on the C156 plants. 1-9: GE1 plants of C156.

**A**

GAGGGTCGTACGAATAATTCGTATCCAACGGAAATACCTGATACAATATACGCTCCATCAAATACCATCACATCGTAT  
 ATGCTTTTATAGTGTGAACACCTTTAACCCTAGTGGGCGGAAATTTTCTACTTTAAATCTGGACCGCTCGTGCTAA  
 AGCACTCGCGATAAGGGGGGGCCACGCCGTAATATTAATTCGGCGTGGGCCCCCTTGTGCGAAAGACTTGG  
 TCTTTAAGTAAATCCACGTCATTTTCCACTATCTATAAAATGACCAAAATACCCCTGCCTCCATGCCTCCACGCCG  
 GTTATAAGATAGAGTTTGAGGCAACCCCTCGGAGTCAACAACATGCCTTCTGCTAGTAAGAAGCTTCAGACTCCA  
 ATCTAAATATGTTTTCTTACCTATCCAAGTGCTCATCTCAAAGAGATGATTTATCCAGTTTTCTCTGGGAGAACT  
 CACACCTTTTCTATTTTCTTCTTGGTGTGCTTCTGAGCTTCATCAAGATGGCACTACCCACTATCATGCTCTTCTC  
 CAGCTTGATAAAAAACCTTGATAGGGATCCTTCTTTTTTCGATTTTGAAGGAAATCACCTAATATCCAGCCAGCT  
 AGAAACTCTAAACAAGTCCCTTGATTACATATCAAAGGACGGAGATATTAACCAGAGGAGATTTCCGAGATCATA  
 AGGTTTTCTCCTCGCAAATCTGACGCACGATGGAGAATATATCCAGACTGCAACGCTAAGGAGGAATATCTTGA  
 CATGATCAAGGAAGAATCCCTCATGAATGGGCAACAAAGCTTCAATGGCTGGAATATTAGCCAACAATATTTC  
 CCTCCAACTGAACCGTATGTGCGCCCTTACAGAATCAGATCTCGCTGCCACGAAGATCTACTCTCGGA  
 GGGAAACCCATCTATACCATGTAAGCATAGACGCTTATACTTACATACATCCTGTCTATACCAACAAGCTCAATCG  
 ACCTTGAATGGATGGCCGATTTAAACAAGGACAATGGAAGGAATGGAATCCGACACCCAGCCTCTACATCTGCGG  
 ACCAACTCGTACGGAAAGACCACCTGGGCTAGAAGTCTCGGACGACACAATATTGGAACGGTACCATCGATT  
 CACCAACTACGATGAACACGCCACCTATAATATCATCGACGACATCCCTTCAAGTTCGTCCCATTGTGGAAGCAAT  
 TAATAGGTTGCCAGTCTGATTTCACTGTCAACCCCTAAATATGGA AAAAAAGAAATAAAAGGTGGGATCCCTTC  
 TATAATTTCTTGAATCCTGACGAAGACTGGATGTTATCAATGACAAGTCAACAGAAGGATTACTTTAAAGATAATT  
 GCGTCAACCACTACATGTGTGACGGGAGACTTTTTTGTCTCGGGAATCGTCGAGTCACTGAACGTGCTCTCCTC  
 ATACGAGTTTATCTAAAGTGATTATTTTTTTGGGGTGTGTTTTTGGATTGCTTTTTTGTATTTCGTGTGTTA  
 TGTAACATATGTAATTTCTATCTACTTGCACAATGAAATATATTCATAAATAATCATT

**B**

GAGGGTCGTACGAATAATTCGTATCCAACGGAAATACCTGATACAATATACGCTCCATCAAATACCATCACATCGTAT  
 ATGCTTTTATAGTGTGAACACCTTTAACCCTAGTGGGCGGAAATTTTCTACTTTAAATCTGGACCGCTCGTGCTAA  
 AGCACTCGCGATAAGGGGGGGCCACGCCGTAATATTAATTCGGCGTGGGCCCCCTTGTGCGAAAGACTTGG  
 TCTTTAAGTAAATCCACGTCATTTTCCACTATCTATAAAATGACCAAAATACCCCTGCCTCCATGCCTCCACGCCG  
 GTTATAAGATAGAGTTTGAGGCAACCCCTCGGAGTCAACAACATGCCCTTCTGCTAGTAAGAAGCTTCA  
 GACTCCAATCTAAATATGTTTTCTTACCTATCCAAGTGCTCATCTCAAAGAGATGATTTATCCAGTTTTCTCTGGG  
 AGAAACTCACACCTTTTCTATTTTCTTCTTGGTGTGCTTCTGAGCTTCATCAAGATGGCACTACCCACTATCATG  
 CTCTTCTCCAGCTTGATAAAAAACCTTGATAGGGATCCTTCTTTTTTCGATTTTGAAGGAAATCACCTAATATCC  
 AGCCAGCTAGAAACTCTAAACAAGTCCCTTGATTACATATCAAAGGACGGAGATATTAACCAGAGGAGATTTCC  
 GAGATCATAAGGTTTTCTCCTCGCAAATCTGACGCACGATGGAGAATATTATCCAGACTGCAACGCTAAGGAGGA  
 ATATCTTGACATGATCAAGGAAGAATCCCTCATGAATGGGCAACAAAGCTTCAATGGCTGGAATATTAGCCAAC  
 AAATATTCCCTCCAACTGAACCGTATGTGTCGCCCTTACAGAATCAGATCTTCGCTGCCACGAAGATCTACA  
 CTCCTGGAGGGAAACCCATCTATACCATGTAAGCATAGACGCTTATACTTACATACATCCTGTCTATACCAACAAG  
 TCAATCTGACCTTGAATGGATGGCCGATTTAAACAAGGACAATGGAAGGAATGGAATCCGACACCCAGCCTCTAC  
 ATCTGCGGACCAACTCGTACCGGAAAGACCACCTGGGCTAGAAGTCTCGGACGACACAATATTGGAACGGTAC  
 CATCGATTTCAACCACTACGATGAACACGCCACCTATAATATCATCGACGACATCCCTTCAAGTTCGTCCCATTGTG  
 GAAGCAATTAATAGGTTGCCAGTCTGATTTCACTGTCAACCCCTAAATATGGA AAAAAAGAAATAAAAGGTGG  
 GATCCCTCTATAATTTTGAATCCTGACGAGGACTGGATGTTATCAATGACAAGTCAACAGAAGGATTACTTTA  
 AAGATAATGCGTCAACCACTACATGTGTGACGGGAGACTTTTTTGTCTCGGGAATCGTCGAGTCACTGAGGCA  
 ACGTGCTCTCTCATACGAGTTTATCTAAAGTGATTATTTTTTTGGGGTGTGTTTTTGGATTGCTTTTTTGT  
 TATTTCTGTGTATGTAACATATGTAATTTCTATCTACTTGCACAATGAAATATATTCATAAATAATCATTTTTAT

**Supplemental Figure 1****Reengineering of the BeYDV Rep coding sequence used in the study.****(A)** Reverse complement view of the LIR-Rep/RepA-SIR sequence isolated from pLSLR.**(B)** Reverse complement view of the LIR-Rep/RepA-SIR sequence in the *de novo*-engineered replicon used in this study.

Upper red font sequences: LIR; bottom red font sequences: SIR; purple sequences: Rep/RepA; green font: upstream ORF sequence (uORF); the light blue sequence TCCCAA was inserted by cloning to interrupt uORF and add the Kozak preference sequence.

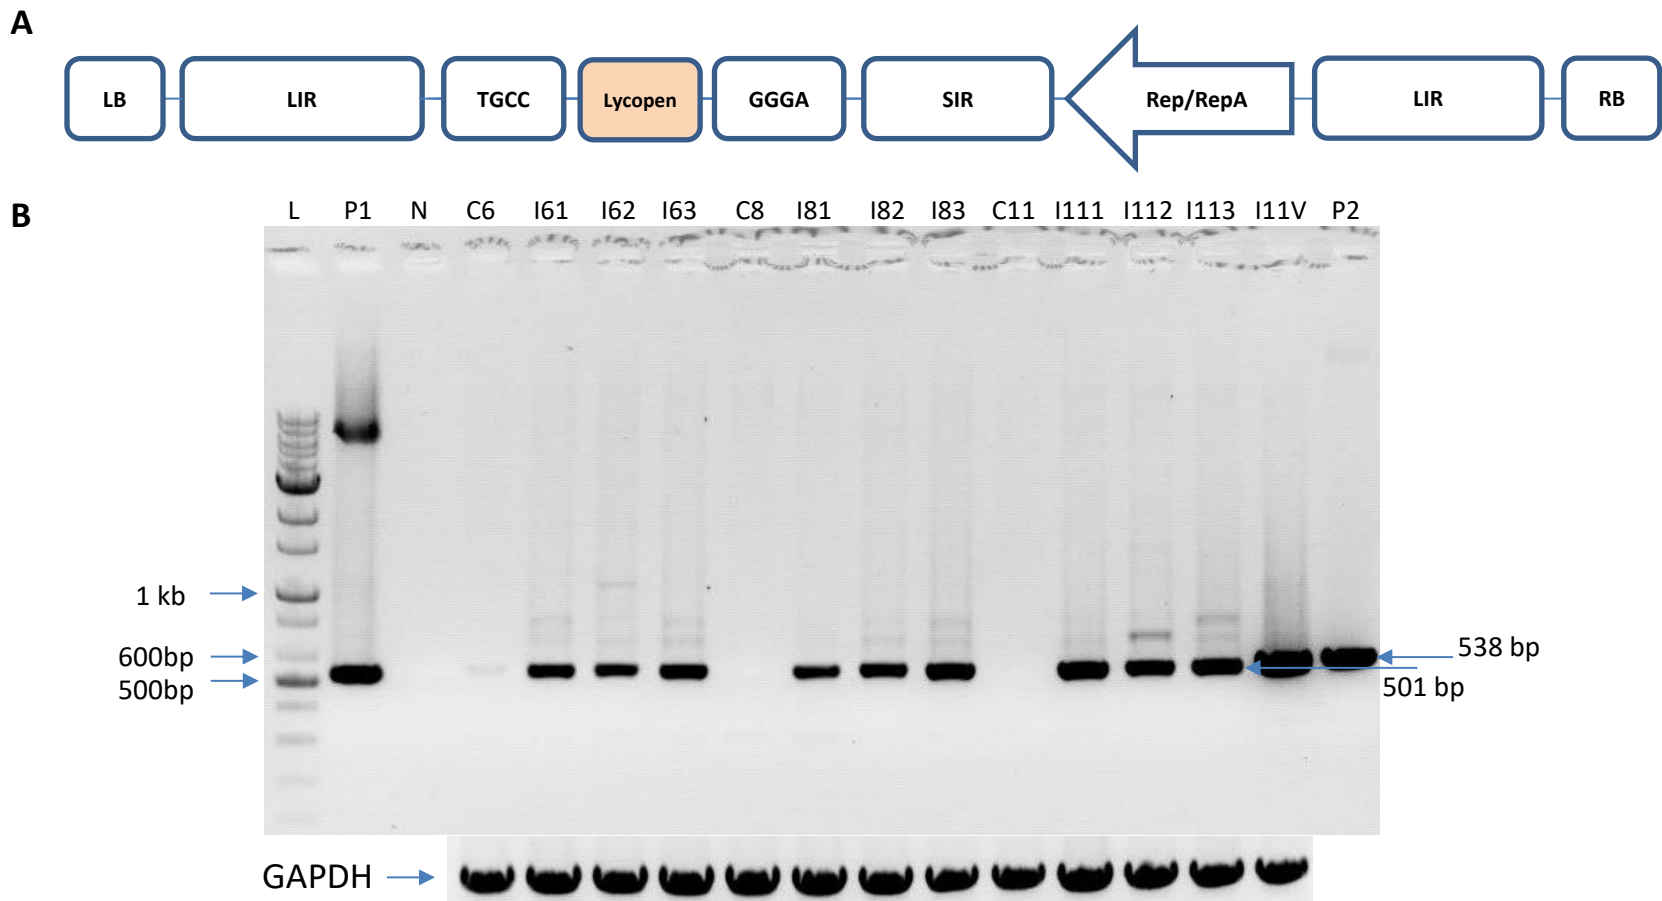

### Supplemental Figure 2.

#### The *de novo*-engineered geminiviral amplicon (named pLSL.R. Ly) and its replication in tomato.

(A) Map of pLSL.R.Ly. The DNA amplicon is defined by its boundary sequences (long intergenic region, LIR) and a terminated sequence (short intergenic region, SIR). The replication-associated protein (Rep/RepA) is expressed from the LIR promoter sequence. All of the expression cassettes of HDR tools were cloned into the vector by replacing the red marker (Lycopene) using a pair of type IIS restriction enzymes (BspI, flanking ends are TGCC and GGGA). Left (LB) and right (RB) denote the borders of a T-DNA.

(B) Circularized DNA detection in tomato leaves infiltrated with pLSL.R. Ly compared to those infiltrated with pLSLR. Agrobacteria containing the plasmids were infiltrated into tomato leaves (Hongkwang cultivar), and infiltrated leaves were collected at 6, 8 and 11 dpi and used for the detection of circularized DNAs. N: water; P1: positive control for pLSL.R. Ly; positive control for P2: pLSLR; Cx: Control samples collected at x dpi; Ixy: infiltrated sample number y collected at x dpi; I11 V: sample collected from leaves infiltrated with pLSLR at 11 dpi. PCR products obtained using primers specific to GAPDH were used as loading controls.



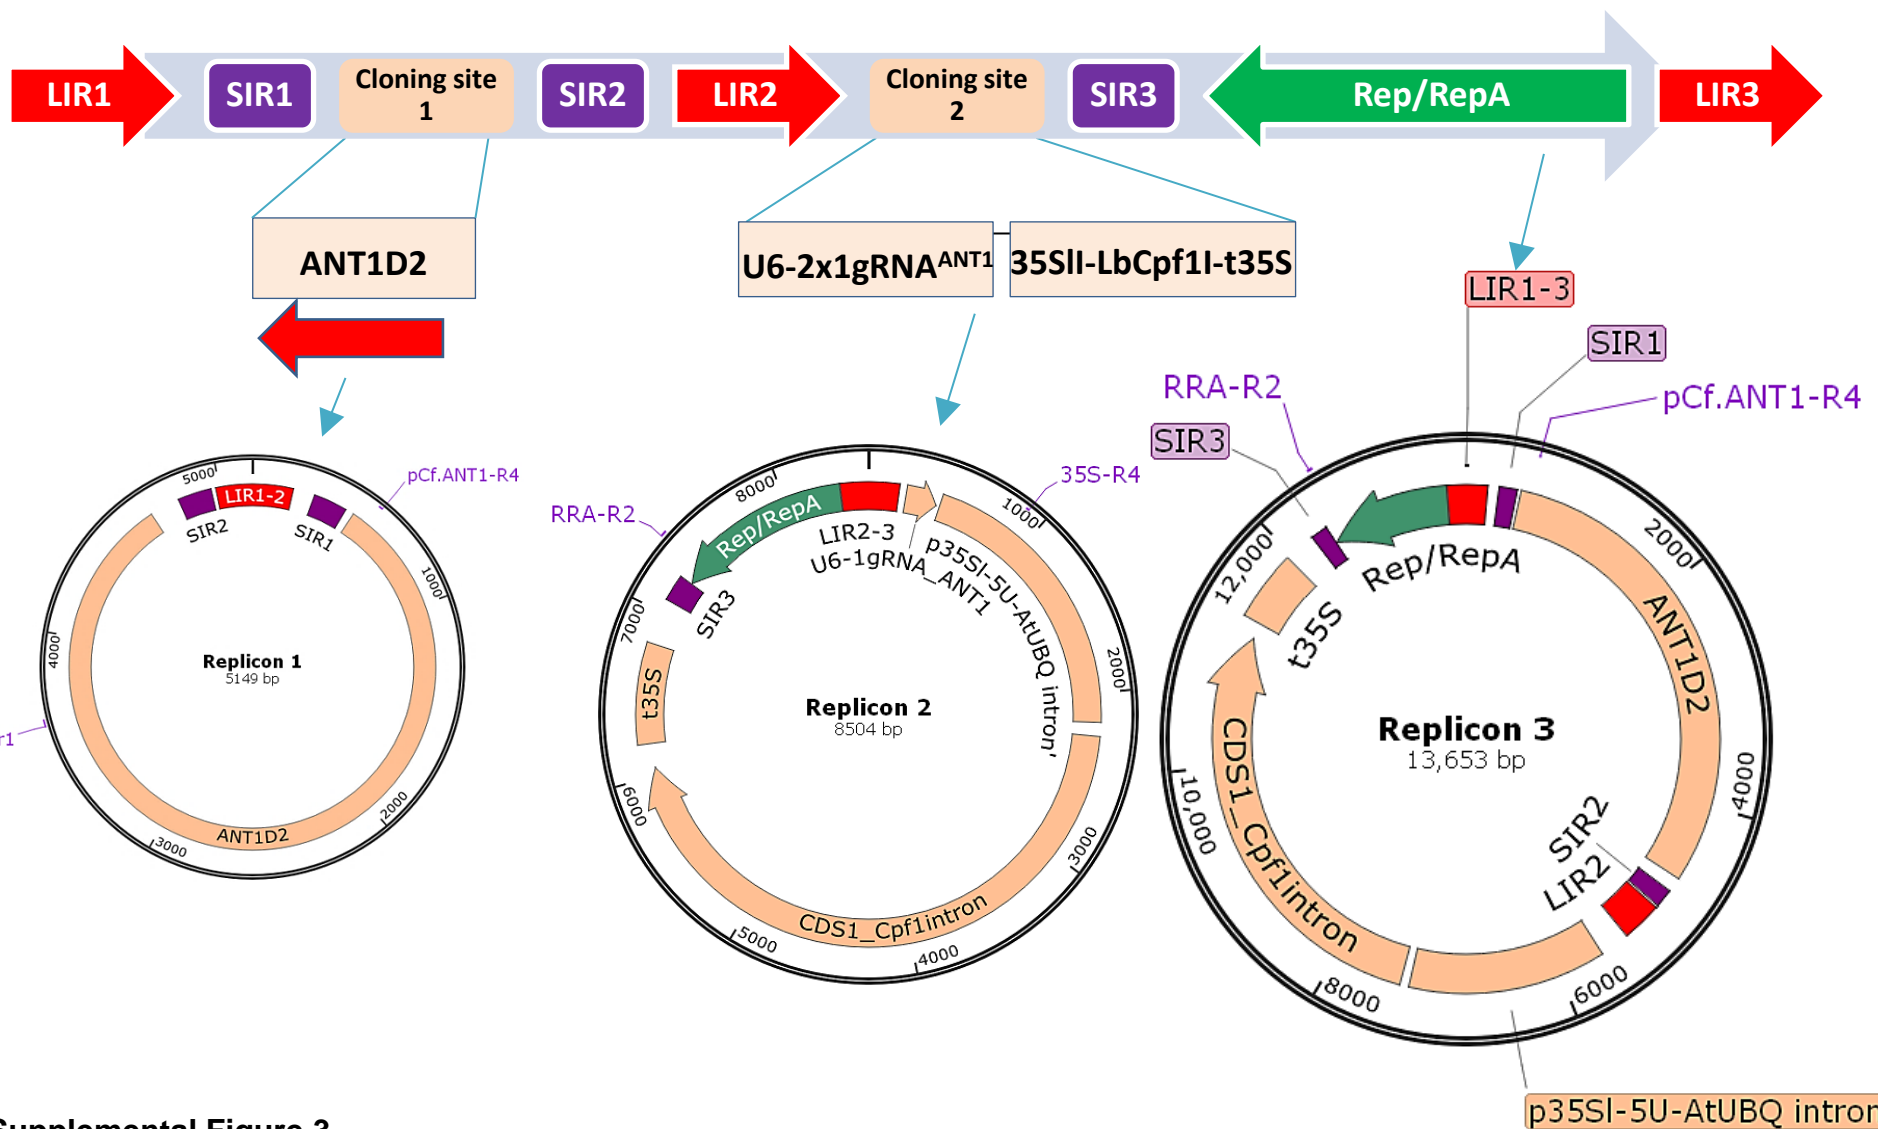

### Supplemental Figure 3.

#### Schematic representation of the system and the released forms of the MR01 multiple replicon system.

Upper panel: The design for the general construction of multiple replicon complexes included three LIR and three SIR sequences. Middle panel: Representative arrangement of the MR01 tool. The donor template was cloned in one replicon, and the other components for inducing DSBs were located the other replicon. Bottom panel: Three replicons would be formed from the MR01. Primer pairs for detecting circularized replicon 1 (Up-r1/pCf. ANT1-R4), replicon 2 (RRA-R2/35S-R4), and replicon 3 (RRA-R2/pCf. ANT1-R4) are indicated in the map of each replicon.

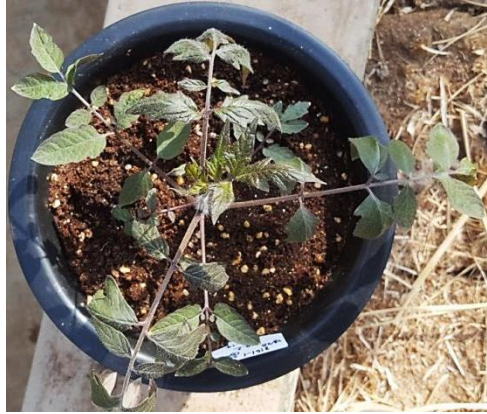

HDR GE0 plant hardening in vermiculite pot

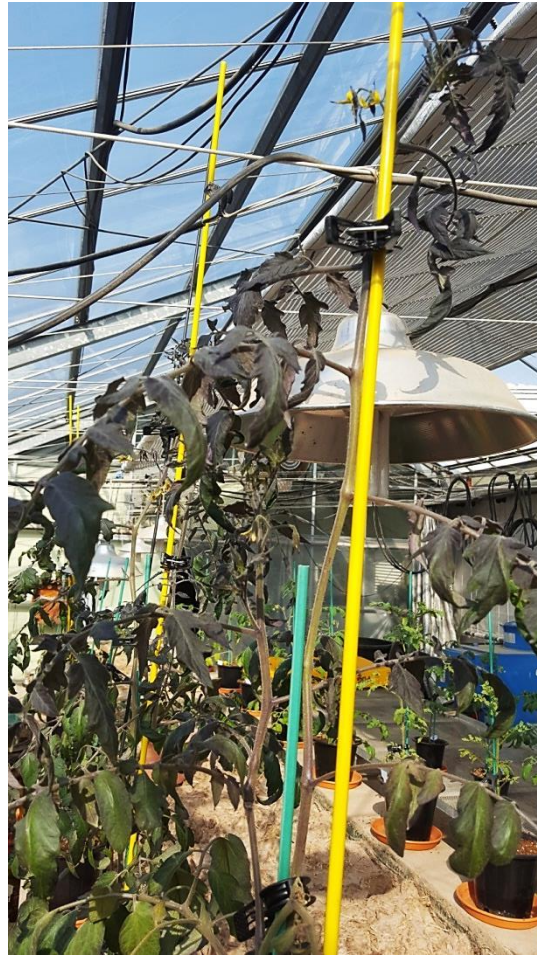

HDR GE0 plant in greenhouse conditions

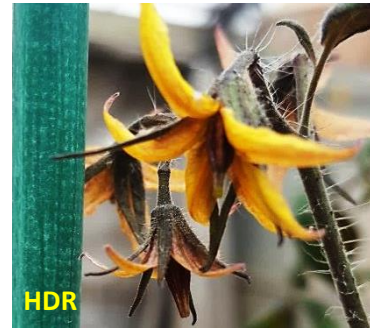

HDR

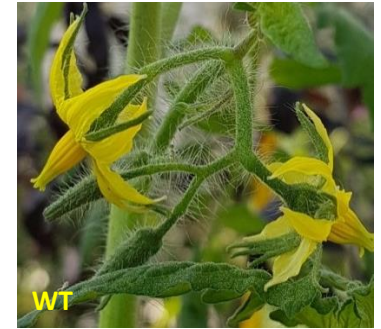

WT

Flowers of HDR GE0 compared to wildtype plant

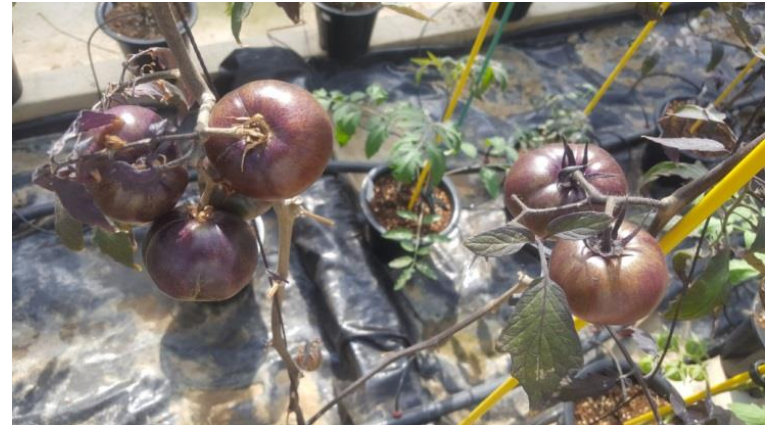

Fruits of HDR plant event C1.4

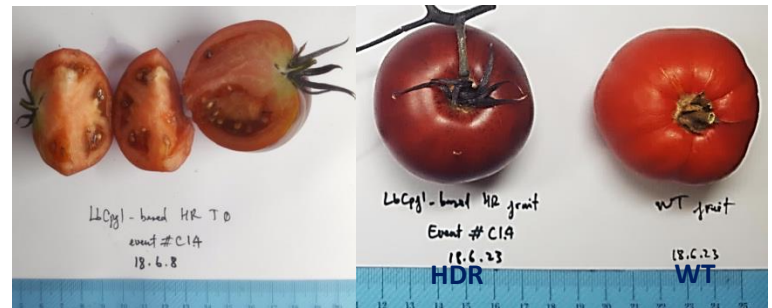

Fruit slices of HDR plant Fruit of HDR GE0 vs. wildtype plant

**Supplemental Figure 4**  
**Morphological appearance of GE0 plants.**



**B****Donor template**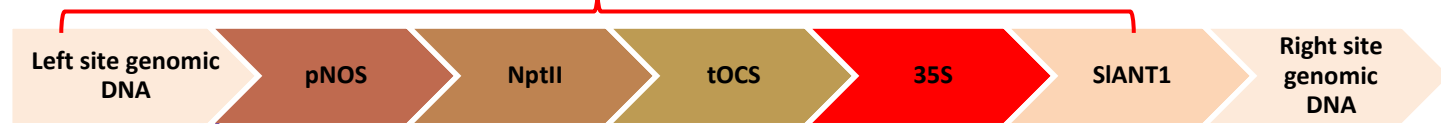

TAGATGAAGGAGTATTTACTATTCAACCACAACACTTTGTCGGTGAGATTA  
 ATCTACTTCCTCATAAATGATAAGTTGGTGTGTGAACAGCCACTCTAAT

sequence included in the donor

AGCCGTTTTACGTTTGAACTGACAGAACC GCAACGTTGAAGGAGCCACT  
 TCGGCAAATGCAAACCTTGACTGTCTTGGCGTTGCAACTTCCTCGGTGA

NOS promoter

C1.1

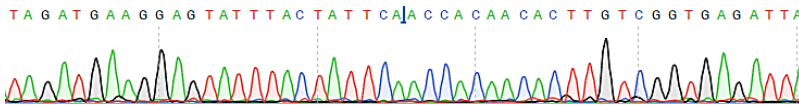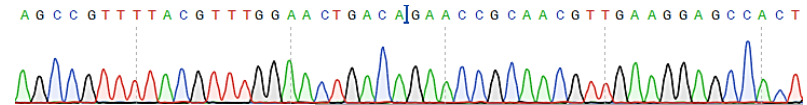

C1.11

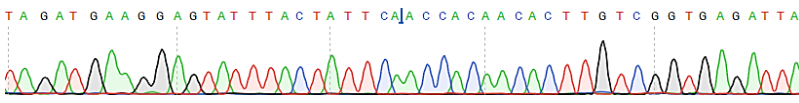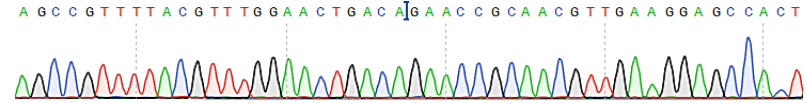

C1.12

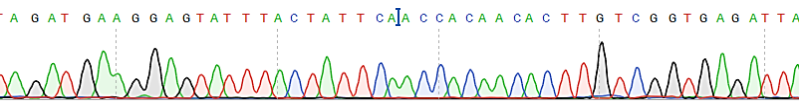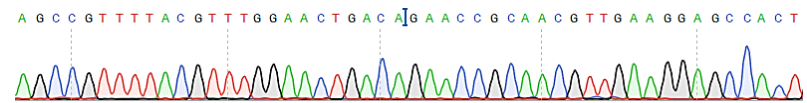

C1.17

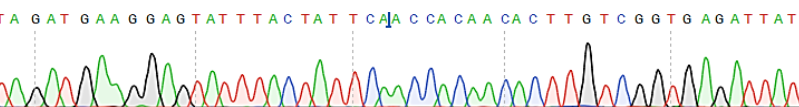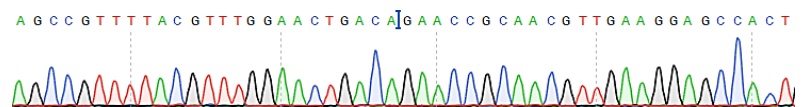

### Supplemental Figure 5 (Continued)

#### Sanger sequencing data to confirm donor exchanges.

(B) Left junction. C1.1, C1.2, C1.3, C1.8, C1.11, C1.12, and C1.17: Independent LbCpf1-based HDR GE0 events

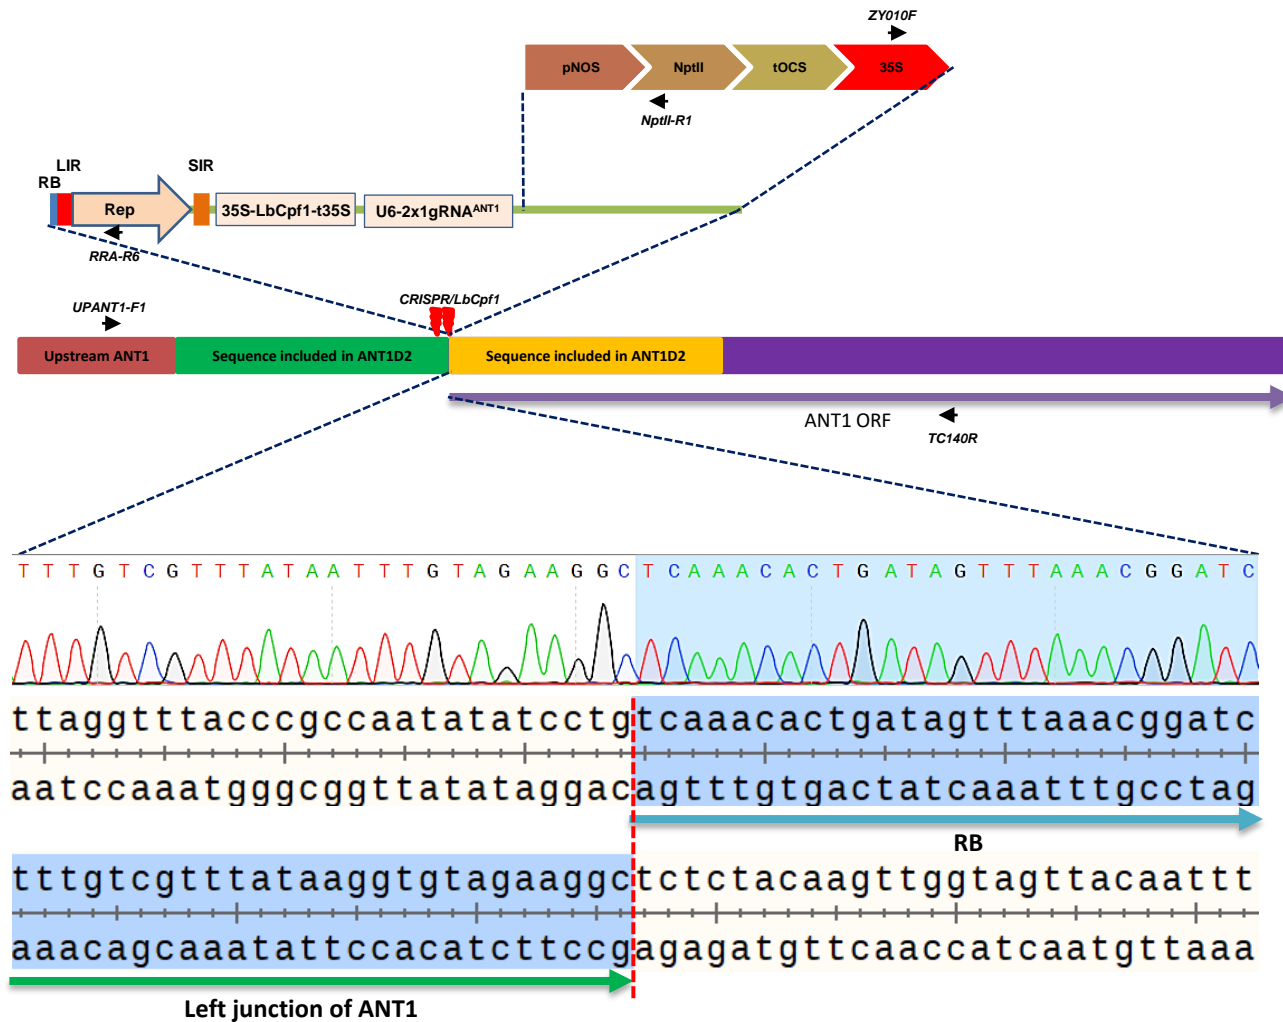

## Supplemental Figure 6.

### Error-prone repair combining HDR and NHEJ in event #C1.3.

The right junctions (amplified by ZY010F/TC140R) of the events were confirmed to be perfectly adapted to HDR repair (Supplemental Figure 5A), but the left junction could not be amplified (using the UPANT1-F1/NptII-R1 primer pair, Figure 1A). Sequencing of the left junction region showed a ligation event between the RB of the T-DNA and the 3' break in the upstream ANT1 promoter sequence via NHEJ. Red dotted line: ligation boundary.

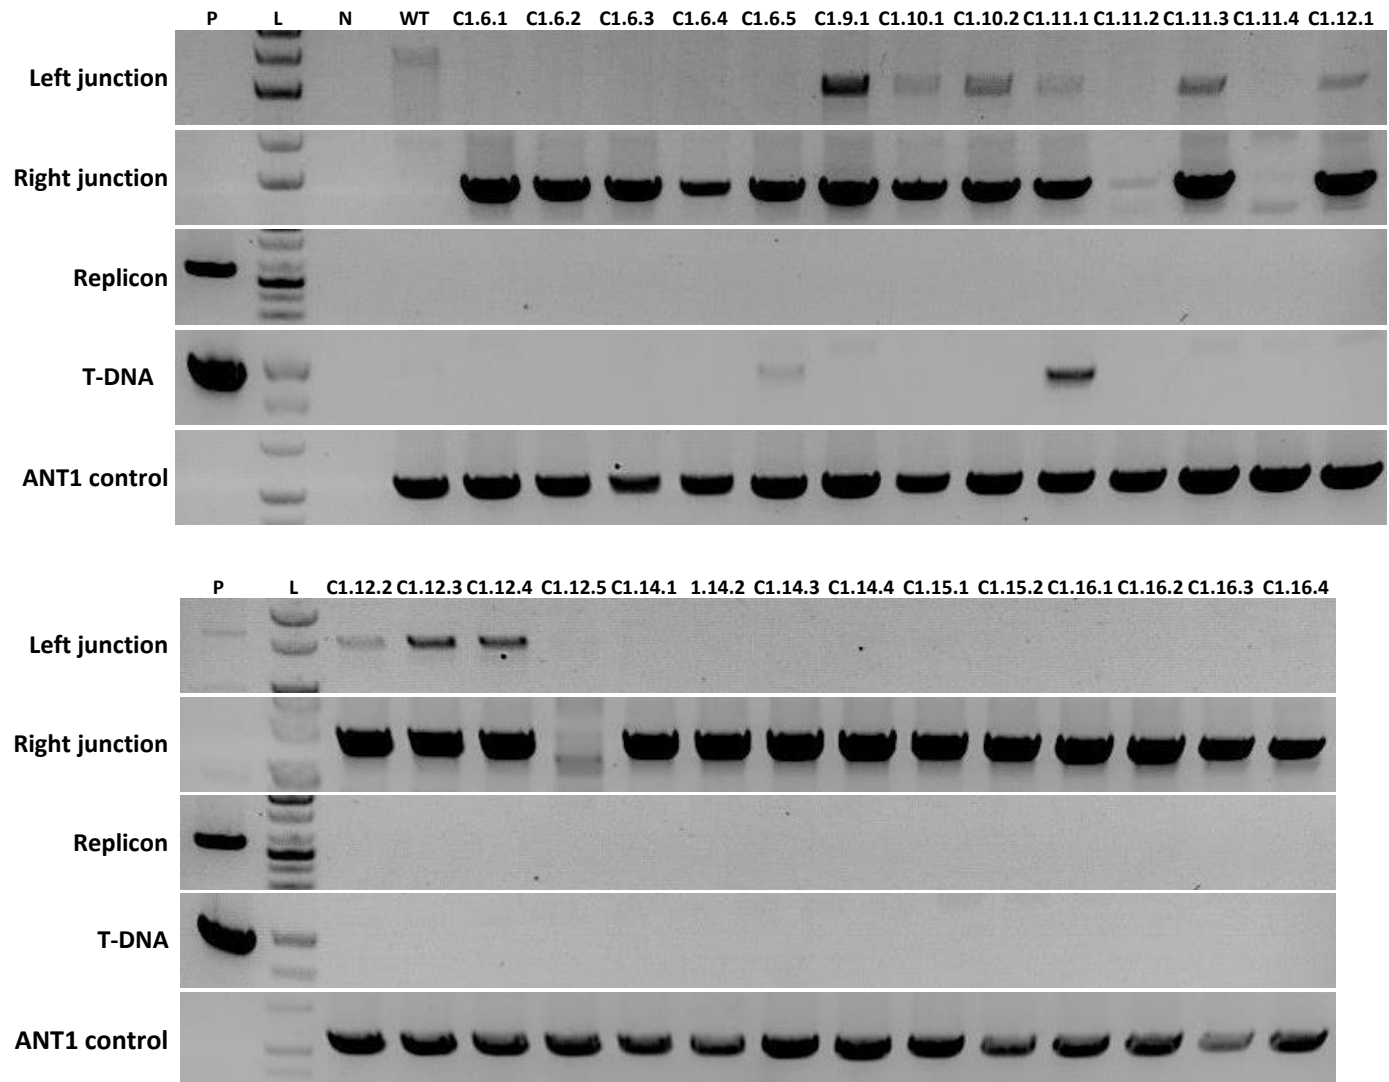

**Supplemental Figure 7.**

**PCR analyses of GE1 plants obtained from GE0 LbCpf1-based HR events.**

P: pHR01 plasmid isolated from Agrobacteria; L: 1 kb ladder; N: water control; WT: wild-type Hongkwang; C1.6.1-C1.6.5: GE1 offspring of event C1.6.; C1.9.1: GE1 offspring of event C1.9; C1.10.1 and C1.10.2: GE1 offspring of event C1.10; C1.11.1-C1.11.4: GE1 offspring of event C1.11; C1.12.1-C1.12.5: GE1 offspring of event C1.12; C1.14.1-C1.14.4: GE1 offspring of event C1.14; C1.15.1 and C1.15.2: GE1 offspring of event C1.15; C1.16.1-C1.16.4: GE1 offspring of event C1.16.

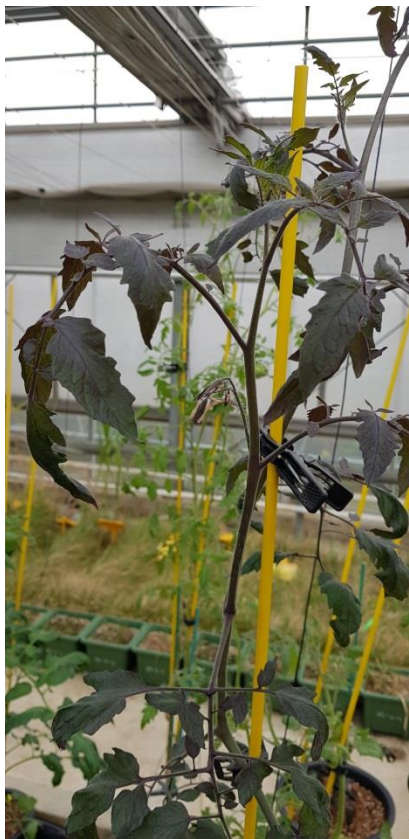

Heterozygous HDR GE1 plant (htHDR)

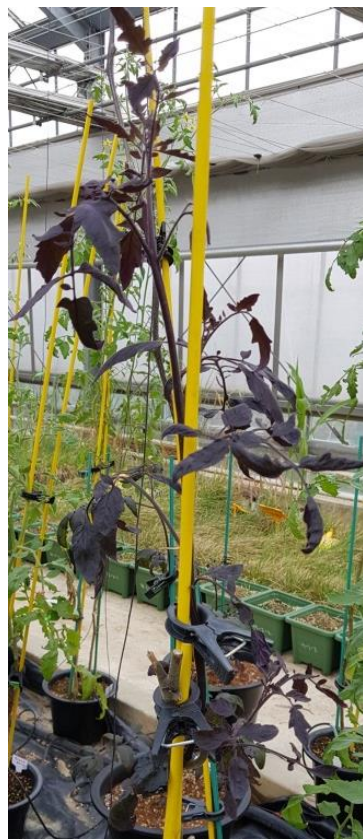

Homozygous HDR GE1 plant (hmHDR)

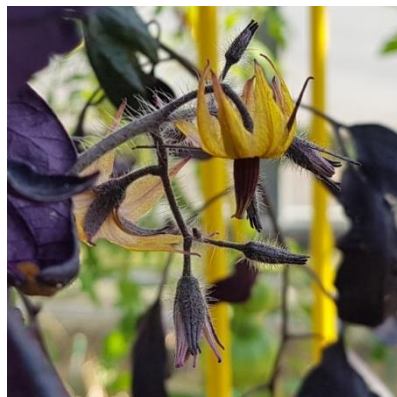

↔  
hmHDR

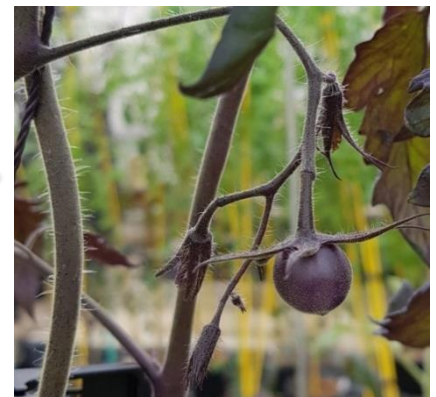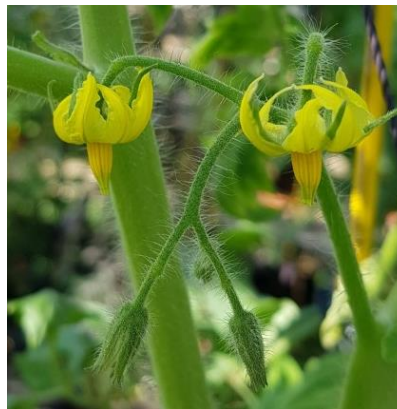

↔  
WT

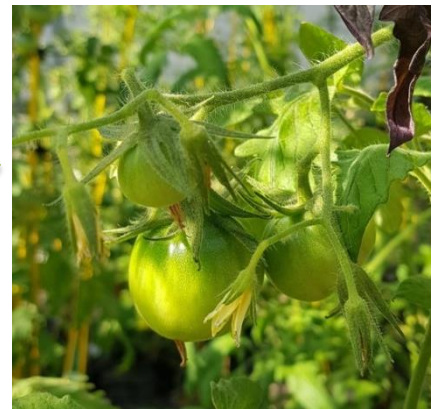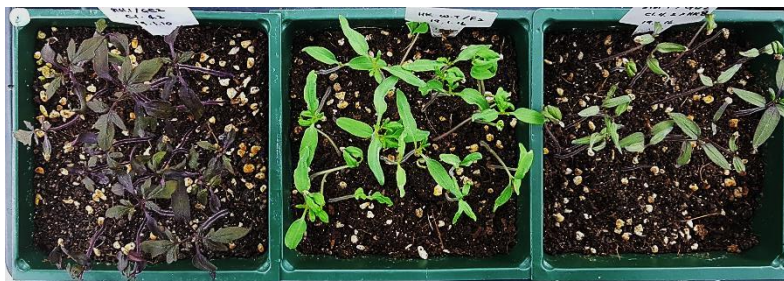

Phenotypes of GE2 plants compared to WT. GE2 offspring (left) of hmHDR GE1 plant back-crossed with WT (middle) resulted in all htHDR BC1F1 plants

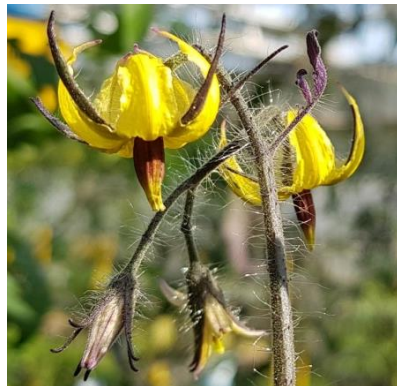

↔  
htHDR

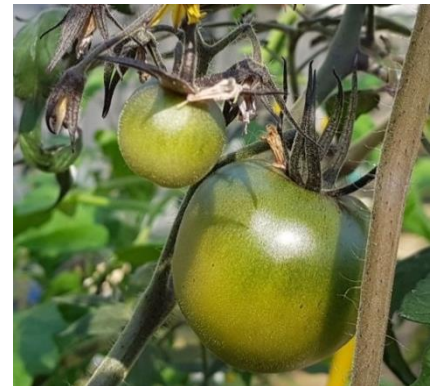

### Supplemental Figure 8 Morphological appearance of GE1 plants

**A**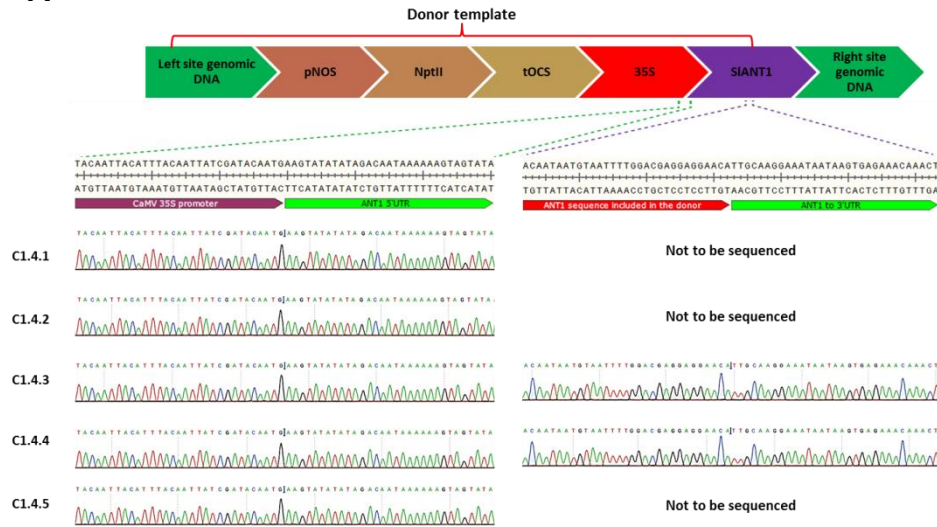**B**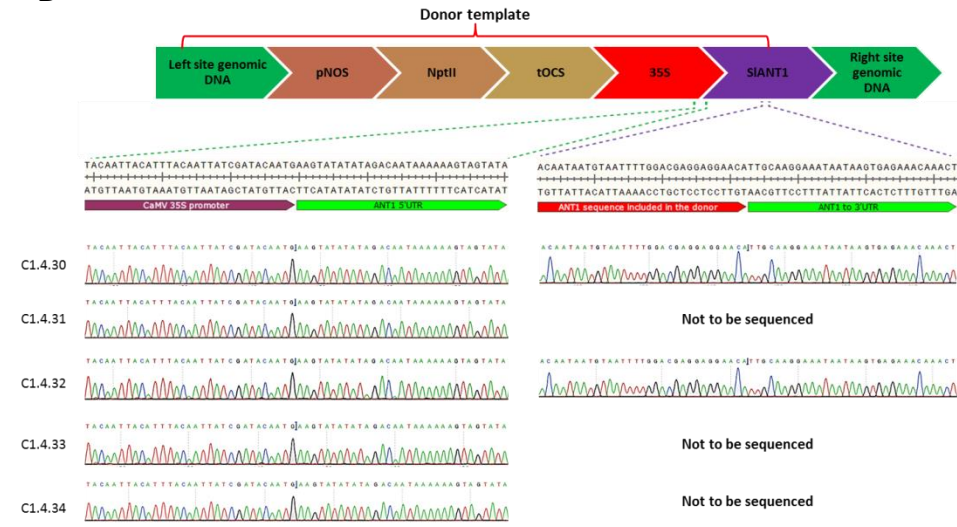

## Supplemental Figure 9

### Analyses of left and right junction sequences of GE1 plants.

Sanger sequencing data to confirm donor exchanges for the right (**A**) and left (**B**) junctions of the GE1 plants are presented



**A**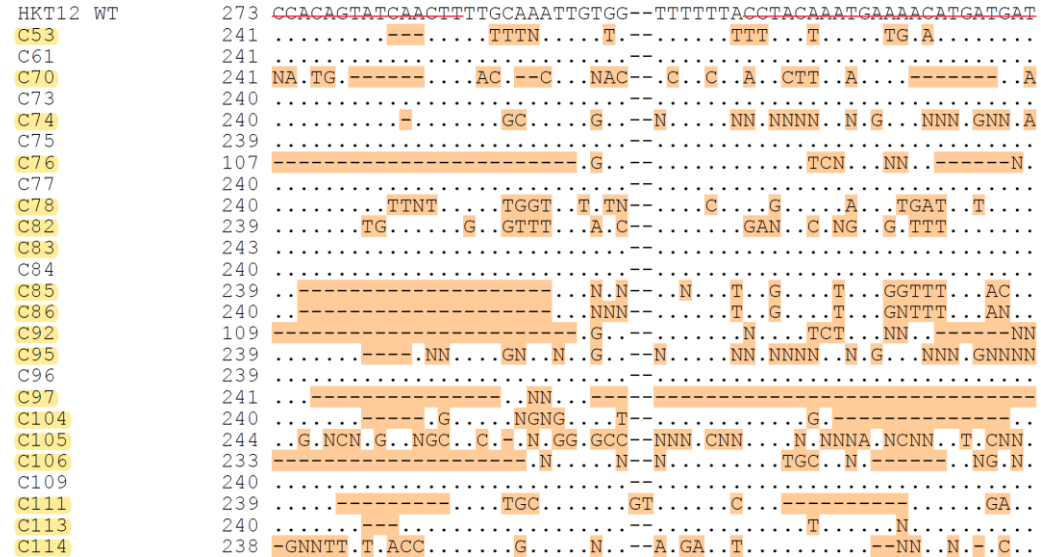**B****RELATIVE CONTRIBUTION OF EACH SEQUENCE (NORMALIZED)**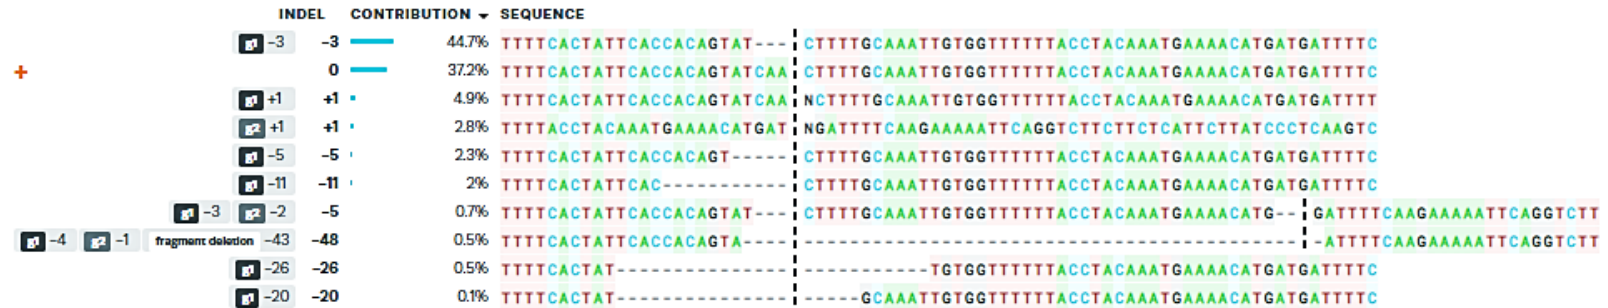

The contributions show the inferred sequences present in your edited population and their relative proportions (in contrast to the Indel plot (Indel Distribution tab) that does not specify sequence contributions). Cut sites are represented by black vertical dotted lines, and the wild-type sequence is marked by a "+" symbol on the far left.

## Supplemental Figure 10.

### Analyses of indel mutations in HKT12 events.

(A) Alignment of raw sequences obtained from Sanger sequencing. 18/25 events (highlighted in yellow) showed strong double peaks indicating single/biallelic mutations. Six out of 25 events showed clear biallelic mutations. C77 showed weak (30%) double peaks. C83 and C105 showed large truncations. (B) Decomposed sequence of event #C53 obtained with ICE Synthego software.

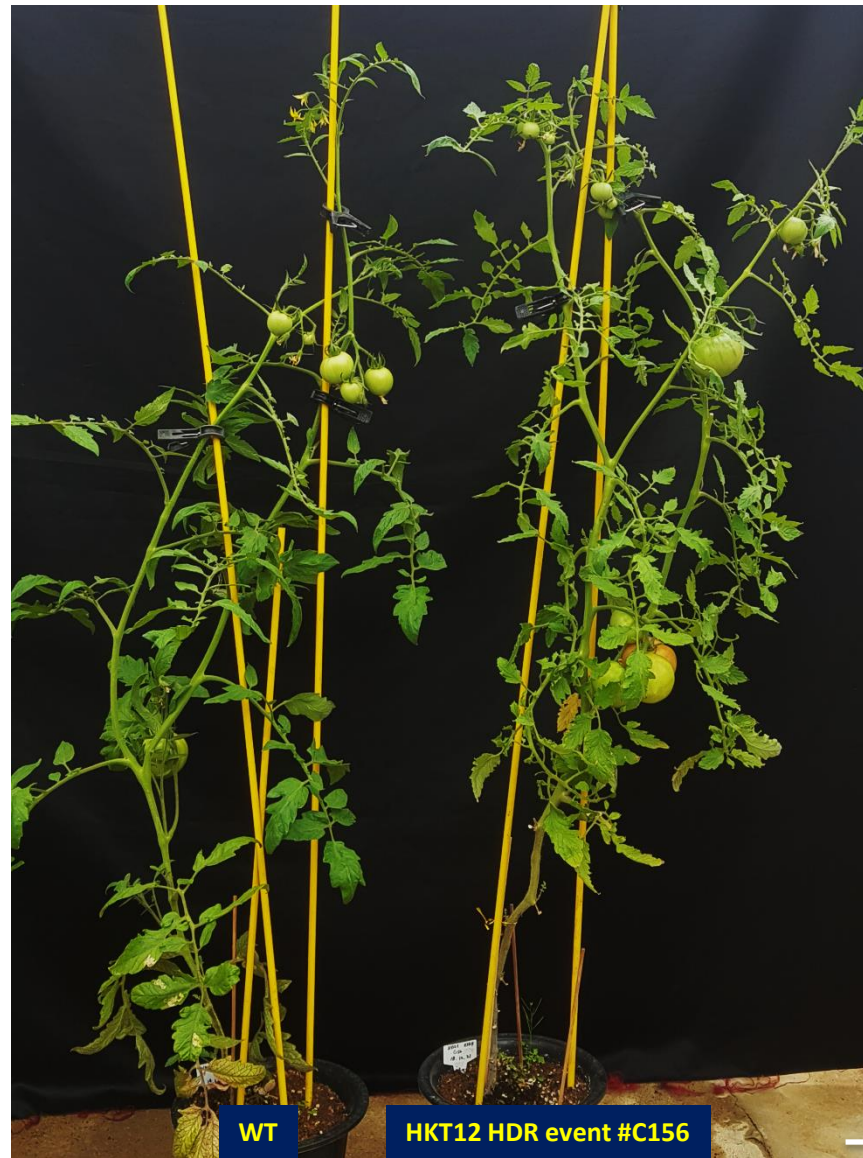

**Supplemental Figure 11.**

**Morphology of the heterozygous HKT12 D217 event in a mature stage**

A plant resulting from the HKT12 D217 event (right) shows a normal morphology and fruit setting compared to the parental plant (left). Scale bars = 2 cm.

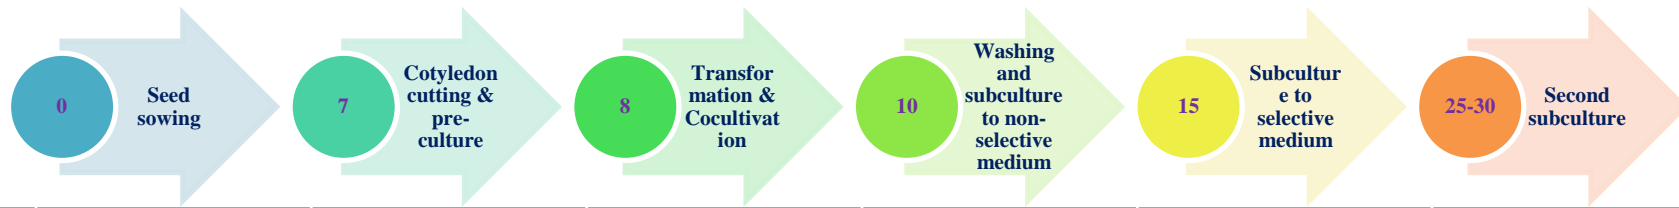

| Stage            | Germination                 | Pre-culture, calli induction | Co-cultivation, calli induction | Non-selection, calli induction | Selection, calli induction and shoot regeneration | Selection, shoot formation and elongation |
|------------------|-----------------------------|------------------------------|---------------------------------|--------------------------------|---------------------------------------------------|-------------------------------------------|
| Medium           | MSO                         | PREMC,                       | ABM-MS                          | NSEL                           | SEL5                                              | SEL5R                                     |
| Temperature (°C) | 25±2                        | 25±1                         | 25±1                            | 31±1                           | 28±1 for 5 days and then 25±2                     | 25±2                                      |
| Photoperiod      | 2 days-dark and then 16L/8D | 1 day dark                   | 2 days -dark                    | 5 days-dark                    | 5 days-8L/16D                                     | 16L/8D                                    |
| Data collection  | -                           | -                            | Sampling at 0dpt                | Sampling at 3dpt and 6dpt      | Sampling at 9dpt, Purple spot counting at 21 dpt  | True shoot record                         |

### Supplemental Figure 12.

#### Timeline and contents of the *Agro*-mediated transformation protocol used in this work.

The step-by-step protocol is presented with each number in the circles indicating the number of days after seed sowing (upper panel), and the treatments used in each step are shown in the lower panel.

**Supplemental Table 1.** The increase in HDR by multiple replicon systems

| No | Construct | Mean of HDR efficiency (%) <sup>*</sup> | Standard error of the mean (SEM) (%) | Fold change compared to pHR01 | Fold change compared to pMR1 | Donor template peak at 3 day post-transformation |
|----|-----------|-----------------------------------------|--------------------------------------|-------------------------------|------------------------------|--------------------------------------------------|
| 1  | pHR01     | 9.81 <sup>a</sup>                       | 0.48                                 | 1.00                          | 1.44                         | 1.00                                             |
| 2  | MR01      | 6.82 <sup>c</sup>                       | 0.99                                 | 0.69                          | 1.00                         | 0.68                                             |
| 3  | MR02      | <b>12.79<sup>b</sup></b>                | 0.37                                 | <b>1.30</b>                   | <b>1.88</b>                  | <b>1.15</b>                                      |
| 4  | MR03      | 12.26 <sup>ab</sup>                     | 1.39                                 | 1.25                          | 1.80                         | 1.56                                             |
| 5  | MR04      | 8.33 <sup>c</sup>                       | 0.73                                 | 0.85                          | 1.22                         | 1.67                                             |

*\*Value with the same alphabet letter is not significantly different (t-test, n=4, p<0.05)*

**Supplemental Table 2.** Primers for detecting circularized replicons released by MR01 and pHR01

| <b>No.</b> | <b>Product</b> | <b>Primer name</b> | <b>Sequence (5'-3')</b>  | <b>Product length (bp)</b> |
|------------|----------------|--------------------|--------------------------|----------------------------|
| 1          | Replicon 1     | ANT1D2-cF1         | CCAAATTTCCCAATGTACCTATCC | 1980                       |
| 2          | (MR01)         | pCf.ANT1-R4        | ACCTCAACGACGCAAGTATT     |                            |
| 3          | Replicon 2     | RRA-R2             | CATCCAGTCCTCGTCAGGATTGC  | 2063                       |
| 4          | (MR01)         | 35S-R4             | CCTTCGAACTTCCTTCCTAGAT   |                            |
| 5          | Replicon 3     | RRA-R2             | CATCCAGTCCTCGTCAGGATTGC  | 1725                       |
| 6          | (MR01)         | pCf.ANT1-R4        | ACCTCAACGACGCAAGTATT     |                            |
| 7          | pHR01 Replicon | RRA-R2             | CATCCAGTCCTCGTCAGGATTGC  | 1468                       |
| 8          |                | pCf.ANT1-R4        | ACCTCAACGACGCAAGTATT     |                            |

**Supplemental Table 3.** Primers for LbCpf1-based HR event analyses

| No. | Product                                            | Primer name | Sequence (5'-3')       | Product length (bp) |
|-----|----------------------------------------------------|-------------|------------------------|---------------------|
| 1   | Left junction                                      | UPANT1-F1   | TGCGATGATCTACGGTAACAAA | 1485                |
| 2   |                                                    | NPTII-R1    | GCGTGCAATCCATCTTGTTTC  |                     |
| 3   | Right junction                                     | ZY010F      | ACGTAAGGGATGACGCACA    | 1380                |
| 4   |                                                    | TC140R      | TACCACCGGTCCATTCCCTA   |                     |
| 5   | ANT1 control                                       | TC140F      | GGAAAATGGCATCTTGTTCCC  | 1056                |
| 6   |                                                    | TC140R      | TACCACCGGTCCATTCCCTA   |                     |
| 7   | Replicon                                           | GR-F1       | TTGAGATGAGCACTTGGGATAG | 557                 |
| 8   |                                                    | pCf.ANT1-R4 | ACCTCAACGACGCAAGTATT   |                     |
| 9   | T-DNA                                              | RB-qF2      | CTCTTAGGTTTACCCGCCAATA | 961                 |
| 10  |                                                    | RRA-R6      | GTTCAGGTTGTGGAGGGAATAA |                     |
| 11  | RB-ANT1D2 integration at the left junction of ANT1 | UPANT1-F1   | TGCGATGATCTACGGTAACAAA | 2042                |
| 12  |                                                    | RRA-R6      | GTTCAGGTTGTGGAGGGAATAA |                     |

**Supplemental Table 4.** Primers for SpCas9-based HR event analyses

| <b>No.</b> | <b>Product</b> | <b>Primer name</b> | <b>Sequence (5'-3')</b> | <b>Product length (bp)</b> |
|------------|----------------|--------------------|-------------------------|----------------------------|
| 1          | Left junction  | UPANT1-F1          | TGCGATGATCTACGGTAACAAA  | 1485                       |
| 2          |                | NPTII-R1           | GCGTGCAATCCATCTTGTTTC   |                            |
| 3          | Right junction | ZY010F             | ACGTAAGGGATGACGCACA     | 1380                       |
| 4          |                | TC140R             | TACCACCGGTCCATTCCCTA    |                            |
| 5          | ANT1 control   | TC140F             | GGAAAATGGCATCTTGTTCCC   | 1056                       |
| 6          |                | TC140R             | TACCACCGGTCCATTCCCTA    |                            |
| 7          | Replicon       | GR-F1              | TTGAGATGAGCACTTGGGATAG  | 1198                       |
| 8          |                | 35S-R3             | CGTCAGTGGAGATGTCACATCA  |                            |

**Supplemental Table 5.** Phenotypic segregation of self-pollinated offspring resulting from LbCpf1-based HDR events.

| No. | GE0 event | Total GE1 plants | Dark purple plant | hmHDR (%) <sup>*</sup> | Light purple plants | htHDR (%) <sup>**</sup> | WT-like | WT (%) |
|-----|-----------|------------------|-------------------|------------------------|---------------------|-------------------------|---------|--------|
| 1   | C1.4      | 113              | 30                | 26.5                   | 37                  | 32.7                    | 46      | 40.7   |
| 2   | C1.6      | 6                | 4                 | 66.7                   | 1                   | 16.7                    | 1       | 16.7   |
| 3   | C1.9      | 1                | 1                 | 100.0                  | 0                   | 0.0                     | 0       | 0.0    |
| 4   | C1.10     | 2                | 2                 | 100.0                  | 0                   | 0.0                     | 0       | 0.0    |
| 5   | C1.11     | 10               | 5                 | 50.0                   | 4                   | 40.0                    | 1       | 10.0   |
| 6   | C1.12     | 7                | 3                 | 42.9                   | 1                   | 14.3                    | 3       | 42.9   |
| 7   | C1.14     | 4                | 4                 | 100.0                  | 0                   | 0.0                     | 0       | 0.0    |
| 8   | C1.15     | 4                | 1                 | 25.0                   | 0                   | 0.0                     | 3       | 75.0   |
| 9   | C1.16     | 7                | 3                 | 42.9                   | 2                   | 28.6                    | 2       | 28.6   |
| Sum |           | 154              | 53                | 34.4                   | 45                  | 29.2                    | 56      | 36.4   |

<sup>\*</sup>Dark purple or homozygous-like HDR plants

<sup>\*\*</sup>Light purple or heterozygous-like HDR plants



**Supplemental Table 6.** Summary of the SIHKT1;2 HDR experiment

| Total number of seeds ( at 70% germination rate) | Total cotyledon fragment | Total analyzed events | Total Potential HDR events | Total true HDR events | HDR efficiency |
|--------------------------------------------------|--------------------------|-----------------------|----------------------------|-----------------------|----------------|
| 460                                              | 640*                     | 150                   | 09                         | 01                    | 0.66%**        |

\*Can be done in only one transformation.

\*\*HKT1;2 gene donor template contains neither antibiotic selection marker nor ANT1 color marker.

**Supplemental Table 7.** Indel mutation rates among *HKT12* samples decomposed by ICE Synthego software

| No. | Event | ICE score | KO-Score | ICE d | R Squared | Mean Discord Before | Mean Discord After |
|-----|-------|-----------|----------|-------|-----------|---------------------|--------------------|
| 1   | C105  | N/A*      | N/A      | N/A   | N/A       | N/A                 | N/A                |
| 2   | C78   | 58        | 56       | 61    | 0.95      | 0.072               | 0.504              |
| 3   | C95   | 97        | 48       | 91    | 0.97      | 0.063               | 0.719              |
| 4   | C74   | 49        | 49       | 41    | 0.98      | 0.07                | 0.556              |
| 5   | C104  | 78        | 40       | 97    | 0.78      | 0.068               | 0.719              |
| 6   | C77   | 14        | 9        | 14    | 1         | 0.084               | 0.226              |
| 7   | C86   | 49        | 49       | 50    | 0.93      | 0.08                | 0.53               |
| 8   | C73   | 1         | 1        | 1     | 1         | 0.077               | 0.18               |
| 9   | C96   | 1         | 1        | 1     | 1         | 0.072               | 0.163              |
| 10  | C70   | N/A       | N/A      | N/A   | N/A       | N/A                 | N/A                |
| 11  | C75   | 3         | 2        | 3     | 1         | 0.065               | 0.253              |
| 12  | C97   | 47        | 44       | 90    | 0.48      | 0.075               | 0.7                |
| 13  | C76   | 6         | 6        | 95    | 0.06      | 0.347               | 0.706              |
| 14  | C114  | 90        | 46       | 92    | 0.9       | 0.08                | 0.708              |
| 15  | C85   | 48        | 48       | 48    | 0.93      | 0.067               | 0.491              |
| 16  | C106  | 48        | 46       | 95    | 0.48      | 0.076               | 0.708              |
| 17  | C82   | 50        | 2        | 46    | 0.96      | 0.074               | 0.439              |
| 18  | C84   | 2         | 2        | 2     | 1         | 0.074               | 0.168              |
| 19  | C111  | 84        | 37       | 92    | 0.84      | 0.07                | 0.704              |
| 20  | C83   | 14        | 11       | 13    | 0.97      | 0.075               | 0.219              |
| 21  | C109  | 3         | 1        | 3     | 1         | 0.075               | 0.176              |
| 22  | C61   | 0         | 0        | 0     | 1         | 0.075               | 0.136              |
| 23  | C53   | 58        | 14       | 50    | 0.96      | 0.081               | 0.436              |

\* Highly variable sequence at the targeted site might be due to large deletion
